# Supplementary material for: Learned cautions regarding antibody testing in mast cell activation syndrome
Source: publisher site journal article supplement (doi:10.1515/dx-2023-0032), 2023-08-11
Supplement: Supplementary file 1 [file j_dx-2023-0032_suppl_001.xlsx]

## Sheet: Sheet1
Online Supplementary Table S1: Case Summaries.
Subject No.	Biologic Sex	Age at Intake	Race	Age at First Symptoms	Age at MCAS Diagnosis	Intake Diagnoses/Symptoms	Diagnostic Findings (tryptase normal on one or more determinations in each case unless stated otherwise; elevated chromogranin A levels listed are without any of the known confounders present (heart/renal/hepatic failure, recent/active proton pump inhibitor use, evident neuroendocrine tumor, or chronic atrophic gastritis))	Appropriate Antibody Findings	Inappropriate Antibody Findings
1	F	53	W	0	54	From birth, a "very sleep baby and a very sleep toddler, always taking naps." Around age 5 she suffered an orofacial herpetic infection, "and after that, things changed," including stomachaches every day, "cramped over in pain, sweating," having to visit the school nurse every day. She started having a lot of fecal urgency/frequency around these times and often would fall asleep at her school des…	chromogranin A in 7/22 at 116.2 ng/ml (normal 0.0-101.8), plasma heparin in 7/22 at 0.07 anti-Factor Xa units/ml (upper normal 0.02), random urinary histamine level in 7/22 at > 663 nmol/mg Cr (normal 0-450), 24-hour urinary histamine level in 7/22 at 78 mcg/24h (normal 0-65), increased (i.e., > 20/hpf) mast cells seen on CD117 staining in 8/22 of old GI tract biopsies originally obtained in 9/16…	negative anti-thyroid antibodies, negative celiac serologies, HSV-2 antibodies negative	IgM anticardiolipin antibodies slightly elevated in the "indeterminate" range without clinical evidence of past or present thromboembolism or anti-phospholipid antibody syndrome, HSV-1 antibodies mildly positive without clinical evidence of past or present HSV-1 infection, mildly elevated anti-IgE-receptor antibodies in 7/22 at 19.8 (normal < 10, not repeated yet) without history of urticaria
2	F	40	W	0	40	She suffered "a lot of throat infections" beginning early in infancy, "recurring all the time," ultimately leading to a tonsillectomy and adenoidectomy at age 4, and this seemed to resolve the problem with these frequently recurrent infections. Also from infancy she had a lot of eczema, to the point where she sometimes had to have steroid creams applied. (The eczema seemed to spontaneously resolv…	plasma heparin in 2/22 at 0.10 anti-Factor Xa units/ml (upper normal 0.02), plasma histamine in 2/22 at 39 nmol/L (normal 0-8), increased (i.e., >20/hpf) mast cells seen on CD117 staining of old GI/GU tract biopsies (staining in 1/22 of Fallopian tube showed 24 mast cells/hpf, staining in 2/22 of an esophageal biopsy from 11/14 showed 33 mast cells/hpf, and staining in 2/22 of a random colon biop…	normal anti-IgE and anti-IgE-receptor antibody levels, comprehensive suite of anti-phospholipid antibody tests all negative, high fecal IgA anti-gliadin in 11/15 suggestive of gluten sensitivity
3	F	51	W	0	lost to follow-up after initial visit	Dating back to her earliest memories as a child, she was "always going to the doctor and getting antibiotics, antibiotics, antibiotics." Menarche came around age 12, and she was immediately afflicted by dysmenorrhea and menorrhagia, but these problems were never investigated or treated. She next notes that she was diagnosed at 18 with rheumatoid arthritis (RA), "but now there's no sign of it." Sh…	did not pursue testing
4	F	32	Asian-Indian	0	only one mildly elevated chromogranin A level found thus far, has not returned for follow-up	She has always (i.e., her entire life) suffered diffusely migratory muscular pains ("no joint pain"), plus she also has been "constipated my entire life until I started eating right in just the last year." Around age 7, one evening while eating shadfish, she developed a "very jammy feeling" in her throat, though her throat did not fully close. She was given Benadryl, which helped her sleep. She n…	chromogranin A in 5/22 at 117.7 ng/ml (normal 0.0-101.8)	negative anti-thyroid antibodies, negative Anaplasma serologies, negative paraneoplastic antibody profile, negative autoimmune neuropathy antibody panel, negative early Sjogren's panel, negative acetylcholine receptor modulating antibody, negative Trypanosoma cruzi serologies, negative autoimmune neuromuscular disease antibody panel, negative anti-cardiolipin antibody profile, negative ANCA panel…	mildly positive EBV VCA IgG and NA IgG with no clinical evidence of past or present EBV infection, parvovirus B-19 IgG minimally elevated with no clinical evidence of past or present parvovirus B-19 infection
5	F	22	W	0	23	A minor anatomical abnormality was noted at birth of a single umbilical artery, and she was mildly jaundiced when born and in general was "a very fussy baby." The patient notes that she "had an upset stomach a lot as a kid," and she also notes she has long suffered "sensory overload." In fact, around age 3 months she was noted to be unusually adversely reactive to lights and sounds. At six months…	random urinary histamine in 1/22 at 1846 nmol/mg Cr (normal 0-450), 24-hour urinary histamine in 9/22 at 78 mcg/24h (normal 0-65)		moderately high anti-IgE-receptor antibodies in 1/22 at 26.6 (normal < 10) but normal in 9/22 at 5.1 (same assay) and without history of urticaria
6	F	45	W	0	awaiting endoscopic biopsies	She "has always been sick" and "has always had a lot of anxiety and a nervous tummy, a lot of stomach and GI issues." She also had at least one febrile seizure in infancy. She was not breast-fed and was fed on cow's-milk. She has "always been told" that her symptoms have been "in my head." She has long had asthma but did not have chronic ear infections or sinusitis. She also had chronic fatigue d…	random urinary leukotriene E4 level in 1/22 at 141 pg/mg Cr (normal <​​= 104), plasma histamine level in 4/22 at 9 ng/ml (normal 0-8)	negative celiac serologies, negative anti-thyroid antibodies, negative ANA, negative ENA panel, negative Lyme IgG/IgM Western blots, negative Ehrlichia and Babesia and Anaplasma and Lyme serologies, negative EBV EA IgG and VCA IgM, normal CCP, normal quantitative immunoglobulin profile (G/A/M/E), negative RAST environmental allergy testing, normal anti-IgE and anti-IgE-receptor antibody levels	high EBV VCA IgG and NA IgG without clinical evidence of past or present EBV infection
7	F	37	W	0	37	As early as toddlerhood (possibly even infancy), she very often had unusual post-prandial fecal urgency. She notes she "always had a lot of diarrhea and stomach pain." She also notes she couldn't tolerate ice cream (but her lactose intolerance wasn't diagnosed until she was 18). She also proved quite early to be very flexible in all of her joints, such as being able to flex her legs back behind h…	plasma histamine level in 6/22 at 4.47 ng/ml (normal < 1.00), and increased (i.e., >20/hpf) mast cells seen on CD117 staining of GI tract biopsies obtained in 5/18 (terminal ileum 61/hpf, duodenum 32/hpf, antrum 21/hpf, colon 24/hpf)	negative serum protein electrophoresis, negative lupus anticoagulant, negative ANCA profile, negative anti-thyroid antibodies, negative direct Coombs, normal routine quantitative immunoglobulin profile (G/A/M), negative anti-cardiolipin antibody profile, negative beta-2-glycoprotein-1 antibody profile, negative anti-prothrombin antibody profile, negative anti-annexin V antibody profile, negative …	total IgE 376 IU/ml (normal < 100), IgM anti-phosphatidylserine antibody at 16 E/ml (normal < 12) without clinical evidence of past or present thromboembolism or anti-phospholipid antibody syndrome
8	F	49	W	no later than 4, possibly earlier	49	As early as age 4 (i.e., dating back to her earliest memories), she had "a lot of stomach issues and chronic ear infections." She also recalls frequently suffering "a lot of ulcers in my mouth" ever since early childhood. Around age 5 she started getting allergy shots, but she remembers "missing most parties in school and just missing a lot of school in general" because of her ear infections (i.e…	plasma histamine in 4/21 at 2.2 ng/ml (normal <​​= 1.8), plasma heparin in 6/22 at 0.03 anti-Factor Xa units/ml (upper normal 0.02), mildly elevated random urinary histamine level in 6/22 at 537 nmol/g Cr (normal 0-450)	negative/normal anti-dsDNA, RF, Smith, Sm/RNP, SSA, SSB, negative anti-thyroid antibodies, normal quantitative immunoglobulin profile (G/A/M/E), normal RAST environmental allergy testing, normal Borrelia serologies, normal RMSF serologies, negative Ehrlichia serologies, normal serum protein electrophoresis (SPEP), comprehensive testing for immunoglobulin (and immunoglobulin subclass) deficiencies…	ANA negative to 1:80 (nuclear/homogeneous and nuclear/speckled) without clinical evidence of lupus and multiple rheumatology consultations finding no rheumatologic disease
9	F	52	W	0	53	She "had a pyloric sphincter problem" right from birth and immediately suffered projectile vomiting from this. She says she suffered vomiting from this literally every day of her life (most commonly at night) from birth through roughly age 12, when it spontaneously remitted. (She also was eventually found to have been born with one ovary. She says her mother took Bendectin (doxylamine/dicyclomine…	multiple elevated mast cell mediator levels in 8/21 (a mildly-moderately elevated plasma histamine at 3.8 ng/ml (normal <​​= 1.8), plasma prostaglandin D2 level at 550 ng/ml (normal 35-115), random urinary prostaglandin D2 at 211 ng/L and extrapolated, based on volume of a 24-hour urine obtained at the same time of 2.10 L, to an estimated 443 ng/24 hours (normal 100-280 on the same assay used for…		EBV serologies in 3/22 were positive for a number of IgG-type antibodies (negative for IgM-type antibodies), but no clinical history suggestive of infectious mononucleosis; mildly elevated titers of a number of IgG and IgM antibodies on a comprehensive infectious disease antibody testing panel without clinical evidence of past or present infection with any of the associated infectants
10	F	50	W	no later than 8, possibly earlier	lost to follow-up after initial visit, has not pursued any testing	She was sexually abused by her babysitter from age 4-6 (she also notes she had severe vaginitis and bleeding which her mother and her pediatrician attributed to bubble baths, but they were unaware that she was being sexually abused) and suffered mental and physical abuse until being taken out of the family home at 16. Around age 8 she started suffering migraines, but evaluations, including a cont…		normal serum protein electrophoresis (SPEP), normal quantitative IgG and IgM, normal IgG subclass profile except for IgG1, negative celiac serologies	repeatedly mildly to moderately low total IgA, mildly low IgG1
11	M	43	W	5	43	He had neonatal jaundice but otherwise had a healthy first 3-4 years, but then he began suffering "bad" constipation around age 5 (requiring enemas at time, but this problem seemed to largely resolve by the end of adolescence), and then around age 10 started suffering "pretty severe" gastroesophageal reflux. Evaluation at the time led to diagnosis of "allergies." He was referred to an allergist, …	24-hour urinary histamine level in 2/22 at 193 mg/24h (normal 0-65), random urinary prostaglandin D2 level in 4/22 at 117 ng/L and extrapolated, based on a 24-hour urine obtained at the same time with a volume of 3.15 L, to an estimated 369 ng/24 hours (normal 100-280 on the same assay used for random urinary PGD2 testing)	negative celiac serologies, negative ENA panel, normal CCP, normal ANA, negative anti-thyroid antibodies (and repeatedly normal thyroid function tests except for occasional minimal elevation in TSH), normal SPEP, negative hepatitis A/B/C serologic screening, negative HIV-1/2 serologies, negative Lyme serologies and negative Lyme Western blots (IgG, IgM) (and negative Lyme PCR in blood), negative …	modest elevations in IgM for multiple Borrelia species despite no recent risk exposures, also modest elevations in IgG for rickettsial and Toxoplasma despite no compatible clinical history, HHV-6 IgG 1:320 without clinical evidence of past or present HHV-6 infection, anti-IgE-receptor antibody level in 2/22 at 19.9 (normal < 10.0) but normal in 6/22 at < 3.5 (same assay), mildly elevated titers o…
12	F	29	W	no later than age 2	29	By age 2 she was starting to suffer "Strep throat a lot" and often got unusually severely sick with this. "The tonsils usually got infected." At 5 she underwent tonsillectomy and adenoidectomy, which resolved the frequent throat infections. At 7 she had a bout of chicken pox. Around age 9 she started suffering intermittent abdominal pain, at one point so bad she was taken to the ER and was diagno…	plasma histamine in 9/21 at 8.6 ng/ml (normal <​​= 1.8), plasma histamine in 11/21 at 13.8 ng/ml (normal <​​= 1.8)	negative anti-dsDNA, negative Lyme serologies, negative celiac serologies, negative ENA panel, negative autoimmune neuropathy panel, negative acetylcholine receptor binding antibody, negative Sjogren's antibodies, CMV IgG mildly positive but IgM negative, negative EBV serologies except VCA IgG positive, positive MMR serologies, negative GAD-65 antibodies, negative anti-pancreatic-islet-cell antib…	repeatedly normal quantitative immunoglobulin profile (G/A/M/E) except for mildly elevated IgE (no clinical suggestions of any hyper-IgE syndromes), normal IgG subclasses except for slightly low IgG1 (negative comprehensive genetic testing for inborn primary immunodeficiency syndromes), positive VZV IgG without clinical evidence of past or present VZV infection, a few mildly elevated IgG titers a…
13	F	49	W	no later than age 4	lost to follow-up after partial initial testing for MCAS at initial evaluation in 2/22	She had lots of colds and eararches and flu-like infections starting around age 4 (she was later noted by others to "get every cold and flu that comes through town"), and by age 6 she also was starting to have urinary tract infections, too. At 11 she began reacting to various foods, started with smoked fish. At 13 she began having some dyspnea at bedtime and found it easier to breathe if she posi…	mildly high CgA in 2/22 at 121.6 ng/ml (normal 0.0-101.8)	normal anti-IgE and anti-IgE-receptor antibody levels
14	F	43	W	no later than toddlerhood	44	She has "always" (dating to her earliest memories) been "very flexible" in her joints, but she otherwise seemed pretty healthy throughout childhood. Menarche came at 11, and her periods have always been symptomatically unremarkable. However, around age 14 she started suffering "really bad pains all over, almost flu-like pains," and she was told they were "growing pains." Evaluations, including by…	24-hour urinary N-methylhistamine in 4/18 at 856 mcg/g Cr (normal 30-200), 24-hour urine histamine in 4/18 at 245 mcg/24h (normal 0-65), plasma histamine in 5/20 at 4.19 ng/ml (normal < 1.00), plasma histamine in 2/22 at 2.06 ng/ml (normal < 1.2)), increased mast cells in the marrow without any other characteristics of mastocytosis seen on re-examination with CD117 staining in 3/22 of a marrow bi…	negative Lyme IgG and IgM Western blots, negative Ehrlichia serologies, normal quantitative immunoglobulin profile (G/A/M/E), normal ASO, ANA normal but also reportedly positive on at least one occasion, negative lupus anticoagulant, negative alpha-gal, negative HIV-1/2 serologies, negative CCP, negative Bartonella serologies, negative Lyme serologies, negative anti-thyroid antibodies, negative a…	mildly positive IgM serologies for certain Borrelia antigens with corresponding negative IgG serologies, also mildly positive IgG serologies for parvovirus B-19 and Toxoplasma gondii without clinical evidence of such infections, elevated EBV VCA IgG and NA IgG without clinical evidence of past or present EBV infection, low pneumococcal titers
15	F	71	W	no later than her earliest memories	undiagnosed; lost to follow-up; never pursued testing after initial evaluation	She has "always" (as long as she can remember) had frequent episodes (almost every day) of "stomach upset" (she wonders whether the rigidity her parents expected of her behavior might have contributed to this), and around age 5 she started suffering frequent ear infections and tinnitus, but as she was growing up in FFFF at the time, the custom there was not to treat these infections with antibiot…
16	F	54	W	6	undiagnosed; lost to follow-up; never pursued testing after initial evaluation	She was the product of a placenta previa "and almost didn't make it -- my mother, too" and was delivered about 3-4 weeks prematurely, but after that she appeared healthy for her first few years. At age 6, though, she got a booster vaccination of some sort, and a few days later she developed "grapefruit-sized yellow bruises all over my body." She was taken to the ER and hospitalized for several we…
17	F	58	W	no later than her earliest memories	58	She has had a "lifelong" problem of an attention deficit disorder (ADD)), but after finishing her undergraduate degree and having initially gone out into the workforce, she started having constipation and abdominal bloating and early satiety and new facial acne, "and that's when I started to form lipomas." She had her first colonoscopy at 23 due to the GI issues. She says she was told she had a "…	plasma histamine in 9/21 at 2.5 ng/ml (normal <​= 1.8), increased (i.e., >20/hpf) mast cells seen on CD117 staining in 3/22 of old GI tract biopsies (up to 28 mast cells/hpf in a duodenal biopsy originally obtained in 10/09 and originally reported (on routine staining) as normal)	normal anti-IgE and anti-IgE-receptor antibody levels
18	F	48	W	no later than her earliest memories	48	She "never seemed to want to eat what was fed to her," plus she has "always" had poor memory (back to at least early childhood, and in spite of good intelligence), and she also mentions, much later in the history, that she also had a variety of environmental allergies and "seasonal asthma" dating back to early childhood. She also never lost any of her baby teeth and had to have them all extracted…	multiple elevated mast cell mediators in 2/22 (plasma heparin at 0.03 anti-Factor Xa units/ml (upper normal 0.02), random urinary leukotriene E4 level in 2/22 at 344 pg/mg Cr (normal <​= 104), 24-hour urinary leukotriene E4 in 2/22 at 292 pg/mg Cr (normal <​= 104), plasma histamine level in 2/22 at 1.52 ng/ml (normal < 1.2)), and increased (i.e., >20/hpf) mast cells seen on CD117 staining in 2/22…	comprehensive anti-phospholipid antibody testing was negative, normal anti-IgE and anti-IgE-receptor antibody levels, positive IgG for Borrelia C6 antigen (and positive FISH testing for Borrrelia at T-Lab)	mildly positive IgM serologies for certain Borrelia antigens without corresponding positive IgG serologies and no recent risk exposures, mildly positive IgG for EBV serologies despite no history consistent with infectious mononucleosis, mildly positive IgG for Toxoplasma gondii despite no history consistent with toxoplasmosis
19	F	17	W	0	18	Her mother was unable to breast-feed her, so she was tried on various formulas and reacted to "all" of them. She was "constantly" colicky and with a distended stomach. "Eventually," though, "some" formula was found which she seemed to tolerate. At 5 she was taken to a chiropractor who told her mother that it would be a good idea for her to undergo "adjustments" even though there had been nothing …	random urinary leukotriene E4 in 2/22 at 118 pg/mg Cr (normal <​​​= 104), random urinary 2,3-dinor-11-beta-prostaglandin-F2-alpha in 8/22 at 2587 pg/mg Cr (normal < 1802), random urinary leukotriene E4 in 8/22 at 207 pg/mg Cr (normal <​= 104))	normal anti-IgE and anti-IgE-receptor antibody levels, high EBV VCA and EA and NA IgG but negative VCA IgM, negative H. pylori IgG, negative food RAST panel, negative Monospot, normal magnesium, reportedly positive IgG but negative IgM Lyme serologies (and positive Borrelia FISH testing at T-Lab), negative anti-thyroid antibodies, mildly positive IgG for Bartonella and Babesia (and positive Barto…	mildly positive IgG for Toxoplasma gondii despite no history consistent with toxoplasmosis
20	F	31	W	no later than her earliest memories	insurance denying coverage of all testing, cannot presently pursue testing to confirm diagnostic suspicion of MCAS	Ever since at least toddlerhood, she started having chronic constipation and allergic reactions to various foods (e.g., M&M candies), often manifesting as a rash about her back or abdomen. She also had a "lazy eye" from toddlerhood, getting worse when she was more tired, and this was "mostly" surgically corrected around age 4. Around age 6-7 she started suffering eczema, mainly about her legs. Al…		negative anti-thyroid antibodies, negative anti-adrenal antibodies, negative anti-Mullerian hormone antibodies, negative Lyme Western blot IgG and IgM and negative Babesia serologies at IGeneX in 7/19, negative EBV serologies, negative Ehrlichia and Anaplasma serologies (and negative Anaplasma PCR), negative CMV serologies	high HHV-6 IgG without clinical evidence of past or present HHV-6 infection, both Bartonella henselae IgG >= 1:256 and Bartonella quintana IgG >= 1:256 at Galaxy in 7/19 without clinical evidence of past or present Bartonella infection
21	F	16	W	no later than her earliest memories	16	From her earliest memories (around age 4), she has "always" been in diffuse body-wide pain (muscles and joints, for the most part, but also including headache) and early on came to think this was a normal state of health. Her mother notes that "all her life," the patient "has been hypermobile." She was regularly active with physical activity until she suffered her sesamoid fracture at 12. By 7 or…	24-hour urinary histamine in 1/21 at 162 mcg/24h (normal 0-65), random urinary histamine in 2/22 at 1047 nmol/g Cr (normal 0-450), 24-hour urinary histamine in 2/22 at 91 mcg/24h (normal 0-65), mildly elevated serum chromogranin A in 2/22 at 133.1 ng/ml (normal 0.0-101.8)	normal anti-IgE and anti-IgE-receptor antibody levels, normal total IgG, IgA, and IgE, normal IgG subclasses, positive MMR serologies, negative anti-thyroid antibodies, normal pneumococcal serologies, mildly positive IgG to Bartonella (with FISH testing for Bartonella positive at T-Lab)	mildly positive IgM serology to a Borrelia species for which IgG serology is negative (and no history of risk exposures), multiple IgG serologies positive for Borrelia species not present, mildly elevated IgM (no history or exam findings suggestive of any plasma cell dyscrasia), mildly positive IgG serology to parvovirus B-19 (but no history suggestive of such infection), mildly positive IgG for …
22	F	27	W	7 months	27	Around age 7 months, shortly after being weaned from breastfeeding and switched to formula feeding, she began reacting to all the formulas tried with full-body hives and diarrhea and vomiting. Pediatric allergy evaluation found no allergies. Other (unspecified) testing was unrevealing. A soy milk formula was finally successful, but when it was tried to transition her from this formula to more con…	plasma histamine in 12/20 at 25 nmol/L (normal 0-8), plasma histamine in 2/22 at 1.79 ng/ml (normal < 1.2), increased (i.e., > 20/hpf) mast cells seen on CD117 staining in 3/22 of multiple old GI tract biopsies originally read as essentially normal or minimally non-specifically inflamed (a right colon biopsy from 7/21 showed 31 mast cells/hpf; a rectal biopsy from 7/21 showed 21 mast cells/hpf; c…	negative Aspergillus fumigatus serologies, Lyme serologies negative, normal anti-IgE and anti-IgE-receptor antibody levels, mildly positive IgG serology for Borrelia burgdorferi (and positive FISH testing for Borrelia at T-Lab), mildly positive IgG serologies (and negative IgM serologies) for Babesia and Bartonella (and positive FISH testing for both at T-Lab)	positive IgG for Aspergillus niger (but clinically ruled out for allergic bronchopulmonary aspergillosis by a pulmonologist), mildly positive IgG serology (but negative IgM serology) for Anaplasma but no clinical evidence of past or present Anaplasma infection, mildly positive IgG levels for seven different Borrelia species, plus mildly positive IgM for yet another Borrelia species without corres…
23	F	63	W	no later than age 2	63	She was found to be anemic at age 2 and was given a liquid treatment of some sort for this, but she doesn't know any more specifics about this and says she doesn't think a cause for whatever type of anemia she had at the time was ever identified. She notes she was "sick a lot" throughout at least toddlerhood and childhood (she doesn't know about infancy), typically with sore throats and frequent …	random urinary leukotriene E4 in 4/22 at 163 pg/mg Cr (normal <​= 104), increased (i.e., > 20/hpf) mast cells seen on CD117 staining in 3/22 of old GI tract biopsies (duodenum from 12/14, originally read as normal, showed 29 mast cells/hpf; rectum from 12/14, originally read as mild active proctitis, showed 30 mast cells/hpf)	negative autoimmune sensorimotor neuropathy profile, negative anti-GAD antibodies, normal IgA subclass profile, normal quantitative immunoglobulin profile (G/A/M), normal anti-IgE and anti-IgE-receptor antibody levels	high anti-thyroid peroxidase antibodies (137.2 IU/ml in 1/20, normal < 5.0) (but never any evidence of correspondingly severe thyroid function or imaging abnormalities), mildly low IgG1 and IgG2, normal to slightly low IgE levels
24	F	21	W	no later than her earliest memories	no testing yet pursued since initial evaluation	By no later than age 2 she was noted by her parents to be "really constipated," and by around age 3-4 she began showing reactions on her skin to contact with clothing tags. Her teachers at school noted, right from the beginning of her schooling, that "I was really hypermobile." Around age 12 she "started getting really intense heartburn," including back pain and dyspnea and bilateral ear pain. Th…	plasma histamine in 7/21 at 19 nmol/L (normal 0-8)	normal anti-thyroid antibodies, normal IgA, negative Monospot, and negative EBV serologies (including NA), mildly positive IgG to Bartonella (and positive Bartonella FISH at T-lab)	mildly positive IgG to Anaplasma, cytomegalovirus, and parvovirus B-19 but no clinical evidence of past or present such infections, mildly positive IgG to five different Borrelia species, mildly positive IgM to another three Borrelia species (but without corresponding positive IgG serologies, and no recent risk exposures), positive EBV NA IgG at a different lab than the one which found all negati…
25	F	46	W	0	46	She had to "have my stomach pumped every day in the hospital" for the four days she was there after being born, and by no later than age 5, she was suffering the multijoint "arthritis" she has had ever since, but throughout childhood they were labeled as "growing pains," and fortunately a dose of aspirin pretty reliably has always resolved these flares of pain. Around age 10 she started having so…	plasma heparin in 10/22 at 0.05 anti-Factor Xa units/ml (upper normal 0.02), increased (i.e., > 20/hpf) mast cells seen on CD117 staining in 3/22 of old GI tract biopsies (duodenal biopsy from 7/20 originally read as normal but showed up to 75 mast cells/hpf; gastric biopsy from 7/20 originally read as normal but showed up to 45 mast cells/hpf)	normal anti-IgE and anti-IgE-receptor antibody levels	mildly positive ANA but no clinical evidence of lupus and multiple rheumatologic consultations finding no rheumatologic disease
26	F	28	W	no later than age 2	diagnostic evaluation still in progress	She was born by emergency C-section because it was determined that her mother had become allergic to her amniotic fluid. Then, at age six months, she had a laboratory-proven case of infectious mononucleosis, including splenomegaly. At 1-1/2 years old she suffered a bout of chicken pox. She also came to suffer pneumonia twice before she was 2 years old. Also around age 2 it started becoming appare…	plasma heparin in 7/22 at 0.03 anti-Factor Xa units/ml (upper normal 0.02)	normal pneumococcal, MMR, and DPT serologies, normal comprehensive quantitative immunoglobulin profiling, normal anti-IgE and anti-IgE-receptor antibody levels, mildly positive IgG (but negative IgM) to Babesia and Bartonella (and positive FISH testing for both at T-Lab)	mildly positive IgG and IgM to Borrelia burgdorferi plus mildly positive IgG to another Borrelia species and mildly positive IgM serologies to yet three other Borrelia species, mildly positive IgG to parvovirus B-19, no clinical evidence of Borrelia or parvovirus B-19 infections, mildly positive IgG for Toxoplasma gondii despite no history consistent with toxoplasmosis
27	F	37	W	no later than her earliest memories	diagnostic evaluation still in progress	She has "always had night terrors" since her earliest memories and occasional sleepwalking in childhood, too. At some point in childhood she began developing "a low level of anxiety and depression," which have persisted ever since. She also notes she was getting "Strep throat" on roughly an annual basis, and this continued well into adolescence. Around age 10 she started noticing episodes of palp…	increased (i.e., > 20/hpf) mast cells seen on several GI tract biopsies (50 mast cells/hpf in a duodenal biopsy obtained in 10/20, and colonoscopy in 9/21 showing 60/35/25/23/28 mast cells/hpf in the terminal ileum/ascending colon/transverse colon/descending colon/rectum)	negative celiac serologies, negative anti-IgE and anti-IgE-receptor antibodies, negative serologies to Bartonella	positive IgM (but negative IgG) to a non-burgdorferi Borrelia species, mildly positive IgG to parvovirus B-19, positive IgM and IgG to multiple Borrelia burgdorferi antigens despite no recent risk exposures, mildly positive IgG for Toxoplasma gondii despite no history consistent with toxoplasmosis
28	F	53	W	0	53	At some point in early childhood she had an allergic reaction of some sort to ampicillin. She also notes she has been constipated and "very reactive to bug bites" her entire life. She also had "recurring bladder infections" and needed surgery around age 6 "to expand my bladder," which resolved the infections. Menarche came around age 12 and was unremarkable. Around age 15 she started suffering fa…	24-hour urinary N-methylhistamine in 2/22 at 225 mcg/g Cr (normal 30-200), 24-hour urinary leukotriene E4 in 2/22 at 109 pg/mg Cr (normal <​= 104), random urinary leukotriene E4 in 2/22 at 156 pg/mg Cr), increased mast cells seen on CD117 staining in 3/22 of a lip biopsy from 8/21 (average of 35 mast cells/hpf were seen on CD117 staining in this biopsy which on original routine staining was felt …	negative ANCA profiles, normal quantitative immunoglobulin profile (G/A/M), negative SPEP (and SFLC) and UPEP and SPIEP and UPIEP, negative paraneoplastic autoimmune profile, negative HIV serologies, negative anti-dsDNA, negative HCV serology, negative ANA, negative ENA panel, negative Lyme IgG/IgM Western blots, negative Babesia and Ehrlichia serologies, negative Lyme serologies, normal mitochon…	normal to "weakly positive" celiac serologies, mildly elevated rheumatoid factor (RF) despite no clinical evidence of rheumatoid arthritis
29	F	16	W	0	diagnostic evaluation still in progress (positive biopsies, but mediator testing thus far negative)	She had an "inhuman cry" right from birth. The patient and her sister both had respiratory distress syndrome (with desaturation, hyponatremia, and suspected syndrome of inappropriate antidiuretic hormone secretion (SIADH)) and had to be watched in the NICU for five days. However, right from being brought home, "she was obviously uncomfortable." Her mother notes that feedings were obviously causin…	high mast cell counts (50/hpf or > 50/hpf) in duodenum (x2), stomach, and random colon	negative anti-thyroid antibodies, negative ANA, normal RF, normal CCP, negative anti-IgE and anti-IgE-receptor antibodies	repeatedly moderately-strongly elevated IgA (negative monoclonal protein evaluations) despite repeatedly negative celiac serologies and negative GI tract biopsies for celiac disease, "indeterminate" Babesia serologies at IGeneX in 10/15
30	F	48	W	0	patient has not yet pursued any testing since the initial consultation	She begins her history by noting that "right after birth, I couldn't tolerate food." She was not tolerating the formulas she was being tried on. She was underweight and there was concern for failure to thrive. As a result, she was started on solid foods by age three months. She was started on cow's milk in her first year, though "by 2 I was having issues with milk." She notes she had extensive al…		Lyme serologies repeatedly negative (and negative tick-borne infectant PCR panel at Mayo), repeatedly negative anti-thyroglobulin antibodies, negative beta-2-glycoprotein-1 antibody profile, negative anti-dsDNA, negative cryoglobulin, negative cryofibrinogen, negative ANCA profile, negative anti-cardiolipin antibody profile, negative ENA profile, repeatedly normal CCP, repeatedly normal quantitat…	ANA normal to 1:320 homogeneous without clinical evidence of lupus and multiple rheumatologic consultations finding no rheumatologic disease, repeatedly strongly elevated anti-thyroid peroxidase antibodies but persistently normal thyroid function testing and imaging
31	F	33	W	0	33	She got stuck in the birth canal during delivery (two weeks early) and required forceps delivery (her mother's pelvis was fractured). She was breast-fed but had "chronic colic" throughout infancy. "She had to constantly have something pressed against her gut or else she would be uncomfortable." At 6 months she was weaned and switched to formula, but she didn't tolerate the initial formula (Simila…	random urinary histamine at >5341 nmol/g Cr (normal 0-450), 24-hour urinary histamine at 1749 mcg/24h (normal 0-65)	negative HSV-2 IgG, negative HIV serologies, negative HSV-1 and -2 IgM, and negative screening serologies for HBV and HCV, normal anti-IgE and anti-IgE-receptor antibody levels	negative Bartonella antibodies despite positive Bartonella FISH at T-Lab, mildly positive IgG to parvovirus B-19 with no clinical evidence of past or present parvovirus infection, multiple mildly positive IgG and/or IgM titers to six different Borrelia species with no clinical evidence of past or present Borrelia infection (and no risk exposures), multiple mildly positive IgG titers to both Babes…
32	F	33	W	no later than age 6	diagnostic evaluation still in progress	She was no older than about 6 by the time she was already starting to suffer episodes of idiopathic urticaria; at one early point she had so much urticaria on her eyelids that she couldn't even open her eyes and had to stay home from school. At 10 she suffered a bout of laboratory-proven "really bad" mononucleosis (even though she doesn't recall having any cervical adenopathy, let alone abdominal…			off-the-scale anti-thyroglobulin antibodies and high anti-thyroid peroxidase antibodies but persistently normal thyroid function testing and imaging, mildly positive IgG to cytomegalovirus and parvovirus B-19 without clinical evidence of past or present such infections, mildly elevated total IgE, anti-IgE-receptor antibodies varying from mildly elevated to normal, mildly positive IgG titers and/o…
33	F	51	W	no later than age 3	diagnostic evaluation still in progress	By no later than around age 3 or 4, she was already beginning to react to at least some fragrances with nausea and vomiting. She had headaches and stomachaches "all throughout grade school." She recalls often asking to stay home from school because she felt unwell, even though she did well in school and was not afraid of it and even though she "did not have a fever or a cold or anything tangible.…		normal quantitative immunoglobulin profile (G/A/M/E), negative anti-IgE and anti-IgE-receptor antibodies, negative anti-thyroid antibodies, negative ASO, positive IgG to EBV EA and NA and VCA, negative IgM to EBV VCA, negative Lyme IgG and IgM Western blots
34	F		W	no later than age 5	54	By no later than the beginning of primary school (and possibly even earlier), she was "always sick with tonsillitis," to the point where she often fell behind in her schoolwork. She also notes she was "always underweight" while growing up. She "developed very late." At 11 she underwent tonsillectomy and adenoidectomy, resolving the upper respiratory tract infections. At 12 she required left hand …	24-hour urinary N-methylhistamine at 252 mcg/g Cr (normal 30-200), random urinary N-methylhistamine at 218 mcg/g Cr (normal 30-200), plasma histamine in 10/22 at 1.9 ng/ml (normal <= 1.8)	negative Lyme IgG and IgM Western blots in 6/15 at LabCorp and in 8/15 at IGeneX, negative anti-thyroid antibodies
35	F	49	W	0	49	She was born with both hips dislocated, requiring casting for the first two months, plus she "had a lot of colds and croup as a kid." She had a tonsillectomy around age 8, but she doesn't know whether that decreased the frequency or severity of her colds. She notes she also had a lot of sinusitis while growing up. Her colds seemed to fade to a "normal" frequency by adolescence. Menarche came at 1…	random urinary leukotriene E4 in 3/22 at 128 pg/mg Cr (normal <​= 104), increased (i.e., > 20/hpf) mast cells seen with CD117 staining in 4/22 in multiple upper/lower GI tract biopsies originally obtained in 9/21 and all originally read as normal (on CD117 staining, though, the gastric biopsy showed 20-40 mast cells/hpf, the duodenal biopsy showed 60-80/hpf, the terminal ileal biopsy showed 70-90…	negative ANA, normal IgG1/IgG3/IgG4, negative Q fever serologies (and PCR), negative Chlamydia and Bartonella and Brucella serologies, negative ANCA screen, negative H. pylori serology, negative EBV and CMV and tick-borne Elispot analyses at ArminLabs in 5/18, negative anti-IgE and anti-IgE-receptor antibody levels	intermittently positive IgM serologies for Babesia duncani and Borrelia (amid negative IgM serologies for both, and persistently negative IgG serologies for both) over 2018-2022 at IGeneX, mildly elevated IgE, mildly low IgG, mildly low IgG2
36	M	49	Hispanic	0	diagnostic work-up pending	He had croup and cough as an infant. He recalls his parents have told him he had to be taken to the emergency room for this at least a couple of times. He recalls that by no later than around age 5 or 6, he had "a huge amount of social anxiety" and often would flush and have diaphoresis when in groups of people, especially when he had to address them. "It felt like the blood was rushing to my hea…	serum chromogranin A in 3/22 at 108.6 ng/ml (normal 0.0-101.8), plasma histamine in 3/22 at 1.03 ng/ml (normal < 1.00), plasma histamine in 7/22 at 1.70 ng/ml (normal 0-1.0)	negative beta-2-glycoprotein-1 antibody profile, normal CCP, negative anti-thyroid peroxidase antibodies, normal IgG subclass profile, negative C. pneumoniae serologies, normal total IgG, IgM, IgE, IgD, and IgG subclasses	mildly positive RF (IgG and IgM, not IgA) with no clinical evidence of rheumatoid arthritis, slightly high M. pneumoniae IgG but negative IgM without clinical evidence of past or present such infection, high EBV VCA and NA IgG but negative VCA IgM and no clinical evidence of past or present EBV infection, mild elevations in total IgA, IgA1, and IgA2
37	F	46	W	no later than age 1 year	46	Even from toddlerhood, she didn't appear to have much interest in eating, plus it started becoming apparent from early in childhood that she was chronically anxious. She also notes that from early in childhood, she suffered outbreaks of perioral hives from ingesting Promise margarine. Around age 11 she started suffering "diarrhea all the time." She notes she had to be "really careful about what I…	plasma histamine in 10/21 at 19 nmol/L (normal 0-8), increased (i.e., > 20/hpf) mast cell counts in all of her old (10/20) GI tract biopsies CD117-stained (40/hpf in duodenum, 27/hpf in antrum, 60/hpf in GE junction, 35/hpf in descending colon) in 3/22	negative anti-IgE and anti-IgE-receptor antibodies	moderately elevated anti-thyroid peroxidase antibody but persistently essentially normal thyroid function tests (on no thyroid medications), repeatedly mildly positive IgG and IgM serologies (but not both) for various B. burgdorferi antigens at one lab and without recent risk exposures, mildly positive IgG serologies for multiple additional Borrelia strains, Rickettsia, T. gondii (multiple antige…
38	F	40	African-American	no later than about age 5	40	She suffered chronically restless legs dating back to her earliest memories. She developed asthma around age 9. Also around this point, every springtime she would endure a few weeks of whitish discharge from her eyes. She also started suffering chronic post-nasal drip around this time, and that, too, has continued to the present. Menarche came at 15 and was unremarkable. At 18 she had her first v…	random urinary histamine > 1,593 nmol/g Cr (normal 0-450), 24-hour urinary histamine at 192 mcg/24h (normal 0-65), 24-hour urinary leukotriene E4 at 114 pg/mg Cr (normal <= 104)	negative anti-IgE and anti-IgE-receptor antibodies, respiratory and food allergen RAST panels largely negative, negative celiac serologies, negative anti-thyroid antibodies, negative lupus anti-coagulants, normal RF, negative anti-cardiolipin antibody profile, negative beta-2-glycoprotein-1 antibody profile, normal total IgM and IgG, normal CCP, negative viral hepatitis A/B/C screening serologies	normal to slightly positive ANAs (up to 1:40) with no clinical evidence of lupus, mildly high total IgA, mildly positive IgG and IgM serologies (but not both) for different B. burgdorferi antigens, mildly positive IgG serologies for multiple additional Borrelia strains, multiple Bartonella strains Anaplasma, Rickettsia, T. gondii (multiple antigens), and multiple HSV strains despite no clinical e…
39	M	40	W	no later than age 4	diagnostic work-up pending	By no later than around age 4 ("before school," while he was still in his native Yugoslavia), he started suffering symptoms of asthma. (He also recalls being a "picky eater" dating to his earliest memories, though he was able to expand his diet a good bit as the years went on. He recalls being especially distasteful of tomatoes and peppers, often causing GI upset (e.g., belching).) When his paren…	bidirectional GI tract endoscopic biopsies in 12/21 showing, on CD117 staining, up to 27 mast cells/hpf in the second part of the duodenum, up to 23 mast cells/hpf in the distal stomach and mid-stomach, and up to 28 mast cells/hpf in the sigmoid colon
40	M	71	W	no later than around age 4	71	He has "always" had a "sensitivity" to fluorescent lighting dating to his earliest memories. At around age 12 he started being affected by seasonal allergies and "waxing/waning" athlete's foot (the latter eventually leading to chronic onychomycosis). He actually was treated with griseofulvin for this while in the military, and this helped a lot ("though in the last couple of years it's exploded a…	chromogranin A twice elevated in 2012 at 7 ng/ml and 9 ng/ml (upper normal 5 on both tests), plasma histamine in 4/22 at 2.09 ng/ml (normal < 1.00), whole blood histamine in 4/22 at 1970 nmol/L (normal 180-1800), increased (i.e., > 20/hpf) mast cells seen on CD117 staining 4/22 of old GI tract biopsies (duodenum from 2/13 (originally read as normal) showing 35 mast cells/hpf, and colon from 2/13 …	normal quantitative immunoglobulin profile (G/A/M/D), normal SPEP, normal rheumatoid factor, negative ANA, negative anti-dsDNA, negative hepatitis C antibody, negative paraneoplastic autoantibody panel, negative cryoglobulin, negative ENA panel, negative CCP, non-reactive RPR, negative inflammatory bowel disease panel, negative Lyme serologies, negative celiac serologies, negative thyroid antibod…	normal to mildly elevated IgE levels, negative ANCA screens except a single p-ANCA elevation of 1:320 without clinical evidence of Wegener's granulomatosis, mildly elevated anti-adrenal antibodies in 6/12 without clinical evidence of adrenal disease
41	F	66	W	no later than age 5	66	She was delivered two months prematurely (requiring two weeks of neonatal hospitalization). She also recalls suffering frequent episodes of tonsillitis throughout childhood and required many courses of antibiotics. She also suffered around age 5 an episode of hepatitis A which went through her neighborhood, and she knows that Benadryl helped with the itching she had with this episode. She also no…	serum chromogranin A level in 4/22 at 123.1 ng/ml (normal 0.0-101.8), increased (i.e., > 20/hpf) mast cells seen on CD117 staining of GI tract biopsies obtained in 5/22 (duodenum up to 40 mast cells/hpf, antrum up to 25/hpf, distal esophagus up to 40/hpf, terminal ileum up to 70/hpf, random colon up to 31/hpf)	normal anti-IgE and anti-IgE-receptor antibody levels, normal IgE, negative Lyme IgG and IgM Western blots, negative ANA, negative RF, negative CCP, normal total IgG, IgM, IgE, IgD, and IgG subclasses	mildly positive IgG and IgM serologies (but not both) for different B. burgdorferi antigens without recent risk exposures, mildly positive IgM or IgG serologies (but not both) for different additional Borrelia strains without recent risk exposures or clinical evidence of past or present such infections, mildly positive IgG serologies for B. henselae, Anaplasma, T. gondii (multiple antigens), and …
42	F	42	W	10	42	For her first nine years or so, she was as healthy as her peers, but around age 10 she started developed abdominal pain and nausea (especially severe on first waking in the morning, sometimes a bit better after eating). She also started having "really sensitive skin" around this time, often taking weeks to heal from minimal injuries to the skin. She was raised in a "devout Mormon family," and her…	whole blood histamine in 10/21 at 2624 nmol/L (normal 180-1800), whole blood histamine in 4/22 at 2715 nmol/L (normal 180-1800), 24-hour urinary histamine in 4/22 at 165 mcg/24h (normal 0-65), 24-hour urinary leukotriene E4 in 4/22 at 136 pg/mg Cr (normal <​= 104), random urinary leukotriene E4 in 4/22 at 227 pg/mg Cr (normal <​= 104), increased (i.e., > 20/hpf) mast cells seen on CD117 staining …	normal anti-IgE and anti-IgE-receptor antibody levels, normal comprehensive quantitative immunoglobulin profiling	mildly positive IgG and IgM serologies (but not both) for different B. burgdorferi antigens and mildly positive IgM or IgG serologies (but not both) for different additional Borrelia strains without recent risk exposures or clinical evidence of past or present such infections, mildly positive IgG serologies for B. microti, T. gondii (multiple antigens), and multiple HSV strains without clinical e…
43	F	55	W	0	diagnostic work-up pending	She was born three months prematurely (weighing 2 pounds) and suffering pneumonia several times throughout childhood and well into adulthood (last time about age 36), often requiring hospitalizations for these episodes from age 4 through age 18. Also, she has "always" (i.e., dating to her earliest memories) had "abdominal issues," principally constipation. Menarche came at 11, and she was immedia…	whole blood histamine in 11/21 at 140 ng/ml (normal 12-127)	negative environmental and food RAST allergen testing, negative celiac serologies, negative ANCA panel, negative ENA panel, negative inflammatory bowel disease panel, negative viral hepatitis A/B/C screening serologies, negative beta-2-glycoprotein-1 antibody profile, negative Lyme serologies, negative ANA, negative serum electrophoresis (SPEP), normal quantitative immunoglobulin profile (G/A/M/E…	IgM anti-cardiolipin antibody minimally elevated but negative IgG and IgA and with no clinical evidence of past or present thromboembolism or anti-phospholipid antibody syndrome, high EBV VCA IgG but negative IgM and no clinical evidence of past or present such infection
44	F	67	African-American	0	67	She was born with club feet, requiring casting of both legs for her first year to correct this. After this, she was quite healthy, but around age 10 she started suffering hayfever and seasonal allergies "really bad." Menarche came at 12 and was unremarkable. At 13 she was found to have neutropenia (it was unknown whether it was new at that point or had already been chronically present), but it wa…	24-hour urinary leukotriene E4 at 127 pg/mg Cr (normal <​= 104), random urinary leukotriene E4 at 269 pg/mg Cr (normal <​= 104), plasma prostaglandin D2 at 170 pg/ml (normal 35-115)), mildly increased (i.e., > 20/hpf) mast cells (26/hpf) seen on CD117 staining of a duodenal biopsy obtained in 9/21	negative anti-IgE antibody level, negative ENA panel, negative pneumococcal serologies, normal SPEP and SPIEP (and SFLC)	negative extensive evaluation (serologies, FISH, PCR) for borreliosis, babesiosis, bartonellosis, ehrlichiosis, and anaplasmosis at one lab in 12/21 but positive FISH for Bartonella and Babesia at another lab in 7/22, quantitative immunoglobulin profiles repeatedly varying from normal to mildly low levels of IgG, IgA, and/or Ig; at another lab, mildly positive IgG or IgM serologies (but not both)…
45	F	17	W	6 weeks	18	She actually developed sepsis at just six weeks of age. She was "covered in blotches" and was initially thought to have meningitis but then was thought to have a Strep infection. She required "massive antibiotics to save her life," but she was able to be discharged after five days. Subsequently, around age 1, soon after solid food was introduced, she started having intermittent rashes about vario…	plasma histamine at 3.45 ng/ml (normal < 1.00), whole blood histamine at 2203 nmol/L (normal 180-1800), increased (i.e., > 20/hpf) mast cells seen on CD117 staining in 10/20 of multiple GI tract biopsies (duodenum 24/hpf, terminal ileum 24/hpf, cecum 28/hpf, ascending colon 28/hpf, transverse colon 28/hpf, descending colon 35/hpf, rectum 34/hpf)	negative anti-IgE-receptor antibody level	mildly positive IgG or IgM serologies (but not both) for different B. burgdorferi antigens and mildly positive IgM or IgG serologies (but not both) for different additional Borrelia strains despite no recent risk exposures and no clinical evidence of past or present such infections, mildly positive IgM or IgG serologies (but not both) for different additional Babesia strains, mildly positive IgG …
46	M	50	W	no later than age 2	diagnostic work-up in progress	He had some sort of an allergic reaction to penicillin given in infancy (unknown type and severity of reaction, and unknown reason why penicillin was being given in the first place), and then, around age 2, on a cold day while being taken to visit friends, he was wrapped in a blanket from that other household, and he immediately had a bad "allergic reaction" and had to be hospitalized with breath…	24-hour urinary histamine at 97 mcg/24h (normal 0-65)	normal anti-IgE and anti-IgE-receptor antibody levels, negative F. tularemia serologies	mildly positive IgG or IgM serologies (but not both) for different B. burgdorferi antigens and mildly positive IgM or IgG serologies (but not both) for B. microti and B. vinsonii without clinical evidence of past or present such infections, mildly positive IgG serologies for T. gondii (multiple antigens) and multiple HSV strains without clinical evidence of past or present such infections
47	F	49	W	0	50	She is the product of a pre-eclamptic pregnancy in which the pregnancy was nearly lost many times, requiring bedrest for the entire last half of the pregnancy. The patient was actually born six weeks early, a bit under 5 pounds. She had neonatal jaundice and required an incubator for her first two weeks. She was tried on bottle feeding but was immediately found allergic to various formulas and ha…	24-hour urinary histamine of 80,201 mcg/24h (normal 0-65, verified on repeat testing), random urinary N-methylhistamine (collected four days after the 24-hour urine was collected) of 1,833 mcg/g Cr (normal 30-200), 24-hour urinary leukotriene E4 at 142 pg/mg Cr (normal <​= 104), increased (i.e., > 20/hpf) mast cells seen on CD117 staining in 6/22 of old GI tract biopsies from 9/21 originally read…	negative anti-IgE and anti-IgE-receptor antibody levels, normal SPEP and SPIEP (and SFLC), normal total IgG and IgM, negative celiac serologies, mildly positive on a range of food RAST tests, negative RF, negative CCP, negative lupus anticoagulant, negative myasthesia gravis serologies, negative ENA panel, negative anti-cardiolipin antibody profile, negative beta-2-glycoprotein-1 antibody profile…	negative inflammatory bowel disease serology panel except for a slightly elevated ALCA and a moderately elevated AMCA and no clinical or biopsy evidence of inflammatory bowel disease, occasionally mildly low IgA, occasional mildly elevated IgE, slightly elevated Coxsackie IgG and IgM serologies with no clinical evidence of past or present such infection, mildly high HSV-1 IgG but negative IgM and…
48	M	46	W	16	diagnostic work-up pending	He appeared healthy for his first 15 years or so, but around age 16, he started having a lot of "digestive problems" (especially anorexia) and severe generalized weakness and fatigue and generalized malaise and frequent sinus infections. He thinks there were exacerbations with almost every change in season, but winters were the worst. Sometimes, too, the symptoms waxed and waned, sometimes almost…		normal ENA panel, negative celiac serologies, normal quantitative immunoglobulin profile (G/A/M/E), negative Lyme serologies	high EBV VCA and NA IgG (and negative EBV VCA IgM) without clinical evidence of past or present such infection, "positive" ANA (titer not reported) but no clinical evidence of lupus
49	F	58	W	no later than age 2	58	At age 2, while growing up in Mexico (where she lived until 14), she started wheezing while being playfully tossed in the air. This wheezing has continued ever since, and she actually needed multiple hospitalizations for this in toddlerhood and childhood. Her mother took her for many evaluations, and she was eventually diagnosed with asthma. This was effectively treated with Primatene mist, which…	serum chromogranin A in 4/22 at 120.3 ng/ml (normal 0.0-101.8), increased (i.e., > 20/hpf) mast cells seen on CD117 staining in 5/22 of old GI tract biopsies (duodendum from 12/21 originally read as normal but showing on CD117 staining up to 46 mast cells/hpf; left colon from 12/21 originally read as normal but showing on CD117 staining up to 38 mast cells/hpf)	normal anti-IgE and anti-IgE-receptor antibody levels, normal 21-hydroxylase antibodies, negative anti-thyroid antibodies, negative EBV antibody panel except for high VCA IgG, negative celiac serology panel, normal comprehensive quantitative immunoglobulin profiling	mildly positive IgG and/or IgM serologies for multiple B. burgdorferi antigens and mildly positive IgG serology for another Borrelia strain, Anaplasma, and T. gondii (multiple antigens) without clinical evidence of past or present such infections
50	F	39	W	12	39	She seemed to be roughly as healthy as her peers for her first 11 years (growing up in Israel), but then menarche came at 12, she was immediately afflicted by what sounds like at least some dysmenorrhea, if not menorrhagia. No evaluation or treatment was immediately pursued. At 17, she started having an upset stomach around the times of her periods, and given the ongoing dysmenorrhea, this is whe…	24-hour urinary histamine in 12/20 at >0.719 mg/24h (normal range 0.006-0.131), increased (i.e., > 20/hpf) mast cells seen on CD117 staining in 3/21 of a colonoscopic biopsy originally obtained in 2019 (originally read as just showing a focus of chronic active colitis, but on CD117 staining showed up to 40 mast cells/hpf)	negative lupus anticoagulant, negative beta-2-glycoprotein-1 antibody profile, negative anti-cardiolipin antibody profile, normal mumps titer, negative GAD-65 antibodies, negative HHV-6 antibodies, negative anti-parietal cell antibody, negative celiac serologies, negative ANA, negative ENA panel, negative RF, negative SPIEP, repeatedly normal quantitative immunoglobulin profile (G/A/M) (and norma…	normal early Sjogren's panel except for a high IgM anti-carbonic anhydrase VI antibody without clinical evidence of Sjogren's disease, low pneumococcal titers, high EBV VCA and NA IgG without clinical evidence of past EBV infection, repeatedly mildly elevated IgG4 and occasionally mildly low IgG2, multiple anti-intrinsic factor antibody levels varying back and forth between normal and mildly posi…
51	F	45	W	0	45	She was born with alkaptonuria (deficiency in production of homogentisic dioxygenase (HGD)) and had trouble tolerating milk right from birth and had to be fed by formula, but she also had trouble tolerating a number of formulas. To this day, if she takes any dairy products, she flushes and suffers a sunburn-type sensation about much of her skin, and sometimes she feels her throat closing to some …	24-hour urinary N-methlyhistamine at 312 mcg/g Cr (normal 30-200), 24-hour urinary 2,3-dinor-11-beta-prostaglandin-F2-alpha at 2862 pg/mg Cr (normal < 1802), increased (i.e., > 20/hpf) mast cells seen on CD117 staining in 5/22 of old GI tract biopsies (EGD biopsies from 5/21 showing up to 23 mast cells/hpf) in a gastric specimen showing mild chronic gastritis on routine staining and up to 48 mast…	negative anti-IgE antibodies, mild broad-based food reactivity on food RAST blood allergy testing, negative Lyme IgG and IgM Western blots, high EBV VCA and EA IgG but negative VCA IgM, negative CMV serologies, normal comprehensive quantitative immunoglobulin profiling, negative RMSF serologies, negative anti-thyroid antibodies	mildly positive IgG or IgM serologies (but not both) for multiple B. burgdorferi antigens and mildly positive IgG and IgM serology for multiple additional Borrelia strains despite no recent risk exposures or clinical evidence of past or present such infections, mildly positive IgG serology for Bartonella and T. gondii (multiple antigens) without clinical evidence of past or present such infection…
52	F	18	W	1	18	Around age 12-18 months, she "started getting chronic bladder infections" (according to her mother, who was providing this early part of the history). She didn't appear to be in pain, but it was particularly foul-smelling urine, and sometimes these episodes actually caused her to vomit. Many urinalyses and cultures were run, and they were always indicative of infection, but it was different infec…	whole blood histamine in 4/22 at 1841 nmol/L (normal 180-1800), increased (> 20/hpf) mast cell counts found on CD117 staining in 5/22 of multiple old GI tract biopsies originally read as normal (duodenal biopsy from 11/21 found to have 28 mast cells/hpf; and, from bidirectional endoscopy in 7/17, terminal ileum with 29/hpf, colon with 21/hpf, duodenum with 32/hpf, and duodenal bulb with 28/hpf)	negative anti-IgE antibody level, negative anti-thyroid antibodies, negative ENA panel, repeatedly normal total IgG, IgM, and IgE	mildly positive IgG or IgM serologies (but not both) for multiple B. burgdorferi antigens and mildly positive IgG or IgM serologies (but not both) for multiple additional Borrelia strains but no recent risk exposures or clinical evidence of past or present such infections, mildly positive IgG serologies for B. microti, B. vinsonii, Anaplasma, and T. gondii (multiple antigens) without clinical evi…
53	F	75	W	0	diagnostic work-up in progress	Other than a literally lifelong history of "easy bruising," she was as healthy as her peers throughout childhood, but with menarche at 11, she was immediately afflicted by at least some degree of dysmenorrhea and menorrhagia, and then at 12 she had her first significant illness, a case of shingles about the left side of her face; it even involved the left eye, and she had to be hospitalized for a…		negative anti-IgE and anti-IgE-receptor antibody levels	mildly positive IgG or IgM serologies (but not both) for multiple B. burgdorferi antigens and mildly positive IgG or IgM serologies (but not both) for multiple additional Borrelia strains without recent risk exposures or clinical evidence of past or present such infections, mildly positive IgG serologies for B. microti, multiple Bartonella strains, Anaplasma, and T. gondii (multiple antigens) wit…
54	F	20	W	0	20	She was born with neonatal jaundice (requiring ultraviolet phototherapy) and also had diffuse (whole-body) eczema right from birth, and some extent of eczema has continued to the present. At merely age 7 months, she was diagnosed with asthma and environmental allergies (including mold) and was already being suspected of possibly having some food allergies, too, such as to peanuts. Around age 2, h…	24-hour urinary leukotriene E4 in 4/22 at 117 pg/mg Cr (normal <​= 104), plasma heparin in 6/22 at 0.04 anti-Factor Xa units/ml (upper normal 0.02), random urinary leukotriene E4 in 6/22 at 107 pg/mg Cr (normal <​= 104)	negative anti-IgE-receptor antibody levels, negative Monospot, normal IgA, negative alpha-gal	anti-IgE antibodies alternately mildly elevated and negative, mildly high IgE, mildly positive IgG and/or IgM serologies for multiple B. burgdorferi antigens and mildly positive IgG or IgM serologies (but not both) for multiple additional Borrelia strains without recent risk exposures or clinical evidence of past or present such infections, mildly positive IgG serologies for B. microti, multiple …
55	F	45	African-American	0	46	He was born three months prematurely and spent those first three months in an incubator. At some point while he was in the incubator, he was given an intramuscular injection of penicillin into the thigh and suffered an acute reaction with swelling of that thigh as well as high fever. He was aware from an early age that his eyesight wasn't normal. He had many visits to the ophthalmologist; he not …	24-hour urinary leukotriene E4 of 197 pg/mg Cr (normal <​= 104), random urinary leukotriene E4 of 252 pg/mg Cr (normal <​= 104), increased (i.e., > 20/hpf) mast cells seen on CD117 staining of multiple old GI tract biopsies all originally read as normal (cecum in 12/21 showing up to 49 mast cells/hpf, esophagus in 2/22 showing 45 mast cells/hpf, gastric body in 2/22 showing 35/hpf, pancreaticobil…	normal anti-IgE and anti-IgE-receptor antibody levels, repeatedly normal total IgG and IgM, negative SPEP, negative anti-thyroid antibodies, negative anti-microsomal antibodies, negative RF, negative CCP, negative ENA panel, negative ANA	mildly positive IgG serologies for multiple B. burgdorferi antigens and mildly positive IgG and/or IgM serologies for multiple additional Borrelia strains without recent risk exposure or clinical evidence of past or present such infections, mildly positive IgG serologies for B. henselae and T. gondii (one antigen) without clinical evidence of past or present such infections, occasional mildly low…
56	F	31	W	0	31	She had "exaggerated allergic reactions," particularly with seasonal allergies and insect bites, right from infancy and toddlerhood. In fact, she began taking once-daily cetirizine from very early in life. Around age 5, due to frequent bilateral ear infections, she had tubes placed in both ears. This led to perforation of the right eardrum, requiring reparative surgery, but otherwise the tubes se…	plasma histamine in 10/20 at 1.23 ng/ml (normal 0-1.00), plasma prostaglandin D2 in 10/20 at 166 pg/ml (normal 35-115)	negative anti-IgE-receptor antibody level, negative alpha gal, non-reactive RPR, negative anti-thyroid antibodies, negative comprehensive anti-phospholipid antibody survey, normal quantitative immunoglobulin profile (G/A/M/E), negative ANA, negative ANCA panel	mildly positive IgG or IgM (but not both) serologies for multiple B. burgdorferi antigens, and mildly positive IgG or IgM serologies (but not both) for multiple additional Borrelia strains without recent risk exposures or clinical evidence of past or present such infections, mildly positive IgG or IgM serologies (but not both) for Anaplasma and T. gondii (one antigen) without clinical evidence of…
57	F	49	W	no later than age 2	49	Her parents were not very attentive to her and separated when she was 18 months old (her mother, with a "borderline personality disorder," had a nervous breakdown), and the patient herself has "been in therapy" since about age 2. She also notes she has "always" (i.e., to her earliest memories) been "a picky eater" in that many foods "just didn't agree" with her. At 5 she started suffering chronic…	plasma heparin at 0.05 anti-Factor Xa units/ml (upper normal 0.02), plasma histamine at 1.50 ng/ml (normal < 1.2), off-the-scale elevated 24-hour urine histamine in 5/22, serum chromogranin A at 469.9 ng/ml (normal 0.0-101.8), increased (i.e., > 20/hpf) mast cells seen on CD117 staining of old GI tract biopsies in 6/22 (a duodenal biopsy from 11/19, originally read as normal, showed 34 mast cells…	negative anti-IgE and anti-IgE-receptor antibody levels, negative anti-thyroid antibodies, negative ENA panel, normal quantitative immunoglobulin profile (G/A/M), normal ANA	mildly positive IgG or IgM (but not both) serologies for multiple B. burgdorferi antigens and mildly positive IgG or IgM serologies (but not both) for multiple additional Borrelia strains without recent risk exposures and no clinical evidence of past or present such infections, mildly positive IgG serologies for B. microti, B. henselae, and T. gondii (multiple antigens) without clinical evidence …
58	M	53	W	26	diagnostic work-up in progress	He had a healthy infancy and childhood and adolescence (but for needing an emergency appendectomy at 17) and early adulthood, but around age 26 he started having headaches, soon followed by diffusely migratory "muscle and joint pain, kind of like when you have the flu." He pursued multiple evaluations, "but none of the doctors knew what to do." He was eventually diagnosed with fibromyalgia and wa…		negative anti-IgE-receptor antibody level, negative comprehensive sensorimotor neuropathy antibody panel	anti-IgE antibody level in 5/22 mildly elevated at 217 ng/ml (normal < 168, not yet repeated)
59	F	23	W	no later than around age 6	diagnostic work-up in progress	She had an unremarkable infancy, toddlerhood, and childhood (though it emerges, in bits and pieces throughout the rest of the history, that she actually had a number of modest issues beginning early in childhood, including sometimes sensing a very modest extent of post-prandial "bloating," plus dental problems emerging in childhood (e.g., some adult teeth did not come in after losing baby teeth),…	plasma histamine in 9/21 at 3.2 ng/ml (normal <​= 1.8)	negative anti-IgE-receptor antibody level
60	F	18	W	0	18	She was "grunting" at birth and was started on ampicillin and gentamicin right at birth and kept in the neonatal ICU for two days, whereupon it was concluded "there was nothing wrong, no pneumonia or anything else," so antibiotics were stopped and she was discharged home with her mother. Ten days after birth she became quite colicky. She was breast-fed through the first eight months, but at three…	plasma histamine in 8/21 at 3.3 ng/ml (normal <​= 1.8), plasma histamine in 2/22 at 2.7 ng/ml (normal <​= 1.8)	normal IgA and IgA subclasses, normal anti-IgE-receptor antibodies, normal IgM, normal ASO, repeatedly negative Lyme IgG and IgM Western blots, negative celiac serologies, normal Pneumococcal serologies in 6/21, negative anti-DNase antibody, negative anti-thyroid antibodies, negative ANA, negative ENA panel, negative Anaplasma and Babesia and Bartonella and Ehrlichia serologies, negative GM-1 ant…	normal to slightly positive M. pneumoniae IgG (and negative IgM) without clinical evidence of past or present such infection, normal to occasionally mildly low IgG and normal IgG subclasses except for occasionally mildly low IgG1 or IgG3
61	F	19	W	0	19	She appeared to "reject" most latex-based solid foods (e.g., bananas and avocados) when first introduced to them at just a few months of age. Her mother notes, "she was inconsolable." At 18 months she suffered a bout of pneumonia around the Christmas/New Year's holiday season, requiring a four-day hospitalization. Her mother also notes the patient "got a lot of colds" and GI illnesses (e.g., diar…	serum chromogranin A in 5/22 at 120.0 ng/ml (normal 0.0-101.8), serum chromogranin A in 7/22 at 125.1 ng/ml (normal 0.0-101.8)	negative anti-IgE antibodies, normal RF, negative ENA panel, negative ANA, normal CCP, negative B. henselae and Brucella serologies, normal comprehensive quantitative immunoglobulin profile	elevated anti-IgE-receptor antibody level in 5/22 at 11.9 (normal < 10, not yet repeated) without history of urticaria
62	F	46	Asian	0	46	She had "a lot of respiratory illnesses" throughout infancy, toddlerhood, childhood, adolescence, and even into early adulthood throughout her medical training, with many of these illnesses typically being treated with a course of antibiotics. She notes she had a "stressful" childhood with "everyday stress" from "family conflict, with a lot of physical violence in the family," though the patient …	24-hour urinary histamine at 135 mcg/24h (normal 0-65), random urinary histamine at 705 nmol/mg Cr (normal 0-450), increased (> 20/hpf) mast cell count in an esophageal biopsy from 11/18 originally read as normal but showing, on CD117 staining in 6/22, 40 mast cells/hpf	negative anti-IgE and anti-IgE-receptor antibody levels, normal comprehensive quantitative immunoglobulin profile	mildly elevated anti-ganglioside GM1 IgG in 2/19 at 1:1600 (normal < 1:800; otherwise negative ganglioside antibody panel) and anti-plexin-D1 IgG positive without clinical evidence of autoimmune neuropathies
63	M	24	W	1 year	diagnostic work-up in progress	In his second year he began developing "recurrent ear infections" (otitis media, requiring antibiotics for about 90 days in the 12-18 month period) in spite of being breast-fed. At 18 months he suffered a bout of flu and pneumonia and otitis media all at the same time; his mother took him to the ER, but he was given a shot of Rocephin and sent home and did not require hospitalization. His mother …		negative viral hepatitis screen, non-reactive RPR, negative anti-intrinsic factor antibodies, negative anti-IgE-receptor antibodies	mildly positive IgG or IgM (but not both) serologies for multiple B. burgdorferi antigens and mildly positive IgG serologies for multiple additional Borrelia strains without recent risk exposures or clinical evidence of past or present such infections, mildly positive IgG serologies for B. duncani, B. vinsonii, Anaplasma, and T. gondii (multiple antigens) without clinical evidence of past or pres…
64	F	35	W	11	35	Around age 11, she started getting brief "heart episodes," rough 2-4 times a year, of tachycardic palpitations and severe presyncope, sometimes occurring when submerged in water or undergoing orthostatic maneuvers but also sometimes seemingly completely out of the blue. The episodes typically lasted only about 30 seconds. She underwent multiple 24-hour Holter monitor studies, which were always no…	24-hour urinary N-methylhistamine at 229 mcg/g Cr (normal 30-200), 24-hour urinary leukotriene E4 at 133 pg/mg Cr (normal <​= 104), increased (i.e., > 20/hpf) mast cells seen on CD117 staining in 1/22 of an old GI tract biopsy (a duodenal biopsy from 1/21 was originally read as normal, but on CD117 staining it showed 45 mast cells/hpf)	negative CellTrend autoantibody testing in 3/22, negative RPR and HIV and HTLV-1/2 and viral hepatitis screen, normal anti-Mullerian hormone antibody level	testing at IGeneX in 4/22 showing high serologies for B. burgdorferi (>80, normal <​40) but repeat testing at IGeneX later in 4/22 for Borrelia/Bartonella/Babesia/Ehrlichia/Anaplasma/Rickettsia infection all negative
65	F	59	W	0	diagnostic work-up in progress	She was born with a Chiari-I malformation (though this was not diagnosed until her late 30s), and she recalls "always" being clumsy and having occasional balance problems and occasional hand tremors which her peers never seemed to have. Menarche came at 13, and she was immediately afflicted by dysmenorrhea and menorrhagia (and even significant bilateral breast pain), but this was never specifical…		normal anti-proteinase-3 antibodies, normal anti-myeloperoxidase antibodies, normal CCP, negative ENA panel, negative anti-IgE antibodies	ANA 1:320 (nuclear, homogeneous) without clinical evidence of lupus, off-the-scale anti-IgE-receptor antibodies (not yet repeated) without severe urticaria
66	F	67	W	0	diagnostic work-up in progress	She "had a history of turning blue" noticed right from birth, "which was terrifying for my parents," but this problem seemed to spontaneously resolve by about the time she was six months old. She also notes that from at least as early as toddlerhood, perhaps even earlier, she was frequently suffering upper respiratory tract infections -- "coughs, colds, flus, bronchitis, pneumonia" -- to the poin…		negative anti-IgE and anti-IgE-receptor antibodies, normal comprehensive quantitative immunoglobulin profile, negative ENA panel, normal RF, negative anti-thyroid antibodies, negative anti-mitochondrial antibodies, negative parietal cell antibodies, negative smooth muscle antibodies, normal SPEP	normal comprehensive anti-phospholipid antibody profile except for occasional borderline elevated IgG anti-cardiolipin antibodies without clinical evidence of thromboembolism or anti-phospholipid antibody syndrome, ANA waxing/waning from normal up to 1:640 (homogeneous) without clinical evidence of lupus, slightly low IgG1, moderately low IgG3, mildly high HSV-1/2 IgG (and negative IgM) without c…
67	M	66	W	no later than age 4	diagnostic work-up in progress	He was "prone to earaches" throughout childhood, "but they weren't really bad." At 13 he developed "a lot of problems with acne," lasting for roughly a decade. He started surfing at 13 and soon began noticing he was more sensitive to cold temperatures than his peers. This cold sensitivity has continued ever since. He otherwise had a healthy youth. He pursued a geology degree in college but had tr…	plasma heparin in 6/22 at 0.03 anti-Factor Xa units/ml (upper normal 0.02)	negative/normal anti-IgE and anti-IgE-receptor antibody levels, normal total IgG and IgG subclasses	very modestly positive alpha-gal despite no clinical evidence of meat allergy, mildly elevated anti-thyroid peroxidase antibody levels with persistently normal thyroid function tests and no clinical evidence of thyroid disease, high EBV and HHV-6 IgG antibody levels (viral loads for both negative, and without clinical evidence of past or present such infections), mildly low total IgA, occasional …
68	M	70	W	no later than age 3	71	He had a fairly healthy childhood except for "having always had a lot of post-nasal drip" and enough throat infections throughout early childhood that he finally underwent a tonsillectomy and adenoidectomy around age 9, which seemed to resolve the throat infections, but after this surgery he "noticed a difference in the way I felt" and started gaining more weight than normal. He thinks, too, his …	24-hour urinary leukotriene E4 at 123 pg/mg Cr (normal <​= 104), random urinary leukotriene E4 at 129 pg/mg Cr (normal <​= 104), increased (i.e., > 20/hpf) mast cells seen on CD117 staining in 6/22 of old GI tract biopsies from 1/15 which were originally read as polyps (on CD117 staining, though, the transverse colonic tubular adenomatous polyp showed up to 40 mast cells/hpf, the sigmoid colon hy…	normal anti-IgE and anti-IgE-receptor antibody levels, normal SPEP
69	F	52	W	0	52	She had severe colic and digestion problems right from birth. "My tummy has been an issue, uncomfortable and bloating, my entire life," she says, "even as a kid." At 1 year, she suffered a bout of chicken pox, which came to cause a very severe encephalitis which for a while was thought likely to cause her demise (or at least cause permanent brain damage; she notes she was told "they had to bring …	24-hour urinary histamine in 5/22 at 176 mcg/24h (normal 0-65), increased (i.e., > 20/hpf) mast cells in multiple GI tract biopsies (a duodenal biopsy in 7/22 showing up to 25 mast cells/hpf on CD117 staining, and CD117 staining in 8/22 of a duodenal biopsy from 12/19 (originally read as normal) showing 26 mast cells/hpf, and CD117 staining in 8/22 of a duodenal biopsy from 9/19 (originally read …	negative anti-IgE and anti-IgE-receptor antibody levels, negative Lyme serologies, negative ANA, normal comprehensive quantitative immunoglobulin profiling, negative cold agglutinins, negative cryoglobulins
70	F	70	W	0	70	She was delivered at least a month prematurely, requiring a stay in the neonatal ICU for at least a month. She recalls her father had "emotional problems and had troubles keeping jobs, so there was always stress" in her large family. She notes that at times throughout childhood she would suffer episodes of "crippling" low back pain, but evaluations by her pediatrician were unrevealing. She otherw…	random urinary N-methylhistamine in 11/20 at 216 mcg/g Cr (normal 30-200), 24-hour urinary N-methylhistamine in 5/22 at 253 mcg/g Cr (normal 30-200), 24-hour urinary histamine in 5/22 at 141 mcg/24h (normal 0-65), increased (i.e., > 20/hpf) mast cells seen on CD117 staining in 7/22 of an old GI tract biopsy (an esophageal biopsy from 7/10, originally read as showing mild inflammation, actually sh…	negative anti-IgE-receptor antibodies, normal anti-IgE-receptor antibodies, negative anti-thyroid antibodies, normal comprehensive anti-phospholipid antibody profile
71	F	38	W	0	diagnostic work-up in progress	She was a "very fussy and colicky" infant for her first year. She notes she has "always been sensitive to highly processed foods," especially foods containing certain chemicals such as aspartame, which reliably causes a "stomachache." Menarche came at 13 and was immediately afflicted by dysmenorrhea (but not menorrhagia) (though this problem seemed to resolve with her first pregnancy). She was he…
72	F	34	W	no later than age 3	34	By no later than age 3, she "started getting Strep infections all the time." Her mother (who was single) had to "quit her job and go on Medicaid" because the patient was having infections so frequently that she couldn't stay in daycare. Also around the same time, from the patient's own earliest memories, she started suffering eczema. At 6 she moved with her mother from JJJJ to KKKK. She recalls h…	random urinary histamine at 560 nmol/g Cr (normal 0-450), 24-hour urinary histamine at 92 mcg/24h (normal 0-65)	negative anti-IgE and anti-IgE-receptor antibody levels, normal quantitative immunoglobulin profile (G/A/M/E), normal RF, negative ENA panel, negative anti-thyroid antibodies, negative celiac serologies, negative RPR, negative HIV serology, negative viral hepatitis screening serologies, negative anti-Mullerian hormone antibody	ANA normal to mildly elevated at 1:160 (speckled) without clinical evidence of lupus
73	F	28	African	0	28	She has had eczema ever since infancy, "and it often used to get infected." (Her sister remembers that a case of chicken pox in the patient at age 2 was particularly bad because the eczema worsened so much at the time.) She notes she was "always very thin" throughout childhood and adolescence, plus she notes she has "always" (her entire life) been constipated and diffusely hypermobile in her join…	plasma heparin in 6/22 at 0.04 anti-Factor Xa units/ml (upper normal 0.02), plasma histamine in 10/22 at 1.19 ng/ml (normal < 1.00), increased (i.e., > 20/hpf) mast cells in a bladder biopsy from 3/19 which on routine staining showed mild cystitis but on CD117 staining showed approximately 65 mast cells/hpf in the lamina propria	negative anti-IgE antibody level, normal quantitative immunoglobulin profile (G/A/M and IgG subclasses) negative SPIEP, negative ANCA panel, negative HIV, negative viral hepatitis screening, negative RAST testing	a mildly-moderately elevated anti-IgE-receptor antibody titer at 20.4 (normal < 10, not repeated yet) without history of urticaria, ANA 1:320 (nuclear; without clinical evidence of lupus and thought by patient's other physicians to be clinically insignificant), moderately elevated IgE, a barely elevated IgD
74	M	31	W	20	32	He was healthy for the first 20 years of his life or so, but in his early 20s he started suffering a malaise which came to be diagnosed at 27 with depression and anxiety. Also that year, while getting ready to graduate from law school (in spring 2018) in a rural location in AAAA (and having spent a lot of his time while at school there in the woods), one day he started having difficulty swallowin…	urinary leukotriene E4 in 10/21 at 136 pg/mg Cr (normal <​​= 104), plasma heparin in 6/22 at 0.06 anti-Factor Xa units/ml (upper normal 0.02), whole blood histamine in 6/22 at 1954 nmol/L (normal 180-1800), 24-hour urinary leukotriene E4 in 6/22 at 140 pg/mg Cr (normal <​= 104), random urinary leukotriene E4 in 6/22 at 147 pg/mg Cr (normal <​= 104)	negative anti-IgE and anti-IgE-receptor antibody levels
75	F	47	W	15	diagnostic work-up in progress	She had a healthy childhood, but around the same time when menarche came (at 15, quite unremarkably so), she also suffered a bout of laboratory-proven infectious mononucleosis ("glandular fever," in her parlance, with robust cervical adenopathy and splenomegaly) and also was told she had a bout of laboratory-proven mumps "at the same time." She was unable to return to full-time schooling until ab…	plasma heparin in 10/22 at 0.07 anti-Factor Xa units/ml (upper normal 0.02), whole blood histamine in 10/22 at 1962 nmol/L (normal 180-1800), increased (i.e., > 20/hpf) mast cell counts (24-66) in five old GI tract biopsies per re-staining with CD117 in 8/22, high EBV VCA/NA/EA IgG (but negative IgM and negative EBV PCR) with clinical evidence of past EBV infection	normal anti-IgE antibodies	mildly positive IgG and/or IgM serologies for multiple B. burgdorferi antigens and mildly positive IgG serologies for multiple additional Borrelia strains without recent risk exposures and no clinical evidence of past or present such infections, moderately elevated anti-IgE-receptor antibodies (not yet repeated) without history of urticaria
76	F	37	W	1	37	Around age 1, she developed a series of fevers which were somewhat difficult to track down, it was ultimately attributed to redundant ureters leading to urinary tract infections. She was placed on antibiotics for a year, which did keep away infections, until her mother decided to stop the antibiotics after a year, and though she continued very occasionally having urinary tract infections, she ove…	plasma heparin at 0.05 anti-Factor Xa units/ml (upper normal 0.02), 24-hour urinary leukotriene E4 at 125 pg/mg Cr (normal <​= 104), random urinary leukotriene E4 at 151 pg/mg Cr (normal <​= 104)	negative anti-IgE and anti-IgE-receptor antibody levels
77	F	68	W	7	68	She had a healthy infancy and toddlerhood and early childhood while growing up in JJJJ, but around age 7, she became "sick in my stomach" for perhaps a couple of months before vomiting up what looked like a "lava rock," after which her abdominal pain acutely resolved. Menarche came at 13 and was unremarkable then and since. Interestingly, fairly severe scoliosis began emerging around this time, d…	plasma histamine in 3/21 at 2.65 ng/ml (normal < 1.00), 24-hour urinary N-methylhistamine in 3/22 at 217 mcg/g Cr (normal 30-200), 24-hour urinary N-methylhistamine in 11/21 at 251 mcg/g Cr (normal 30-200), random urinary N-methylhistamine in 8/21 at 250 mcg/g Cr (normal 30-200), 24-hour urinary N-methylhistamine in 9/20 at 242 mcg/g Cr (normal 30-200), increased (i.e., > 20/hpf) mast cell counts…	repeatedly negative extensive food RAST testing, normal CCP, repeatedly negative ANA, negative anti-thyroid antibodies, normal fecal IgA, repeatedly negative celiac serologies, negative 21-hydroxylase antibody, normal anti-IgE-receptor antibodies, negative coccidioides serologies, essentially normal pneumococcal serologies, normal quantitative immunoglobulin profile (G/A/M/E and IgG subclasses)
78	F	39	W	0	39	From early in infancy, she "never wanted to be touched and never wanted to be held." She was not breast-fed due to her mother's inability to produce milk. She notes she has "always" -- literally her entire life, from her earliest memories to this moment -- has been nauseous. She recalls being "car-sick," feeling very "dizzy" and nauseous anytime she has ever been in a car, including her car trip …	plasma heparin in 6/22 at 0.04 anti-Factor Xa units/ml (upper normal 0.02), plasma heparin in 9/22 at 0.04 anti-Factor Xa units/ml (upper normal 0.02)	anti-Mullerian hormone antibody, mildly high C. albicans IgG and IgA but normal IgM, non-reactive RPR, positive immunity to hepatitis A and B, normal anti-IgE and anti-IgE-receptor antibodies, negative celiac serologies, negative comprehensive anti-phospholipid antibody suite
79	F	27	W	0	28	She had a "traumatic birth" (the umbilical cord was wrapped around her head and her mother had a Strep infection causing fever, so she required delivery via emergency C-section, and she had neonatal jaundice, requiring an NICU stay for about a week) and then was colicky for the first five months and had "milk allergy" requiring "special formula" but after that had a "perfectly healthy childhood" …	plasma histamine in 11/21 at 1.27 ng/ml (normal < 1.00), serum chromogranin A in 6/22 at 102.5 ng/ml (normal < 101.8), plasma heparin in 6/22 at 0.03 anti-Factor Xa units/ml (upper normal 0.02), serum chromogranin A in 7/22 at 133.7 ng/ml (normal < 101.8), plasma heparin in 7/22 at 0.04 anti-Factor Xa units/ml (upper normal 0.02), 24-hour urine histamine in 7/22 at 43,885 mcg/24h (normal 0-65)	negative anti-IgE and anti-IgE-receptor antibody levels, negative anti-thyroid antibodies, normal comprehensive quantitative immunoglobulin profiling (G/A/M/E/D and G and A subclasses)	history of "testing positive twice" for "active Rocky Mountain Spotted Fever" (RMSF) without clinical evidence of past or present such infection and without any prior treatment for such infection
80	F	46	W	no later than age 8	46	Other than strabismus becoming apparent in infancy and requiring corrective surgery at 6, she had a healthy infancy, toddlerhood, and most of childhood (except for "some chubbiness" emerging early in childhood and persisting ever since, plus a year-long bout of depression (possibly due to envy of a high-achieving sibling) which came out of the blue at age 8, plus she also suffered at 8 (after the…	plasma heparin at 0.03 anti-Factor Xa units/ml (upper normal 0.02), 24-hour urine histamine of 73 mcg/24h (normal 0-65), increased (i.e., > 20/hpf) mast cells seen on CD117 staining in 7/22 of old GI tract biopsies (a colonic biopsy from 3/22, originally read just as showing "moderate chronic and acute inflammation," actually showed 35 mast cells/hpf on CD117 staining)	a negative anti-IgE antibody level, negative celiac serologies, normal SPEP, normal RF, negative Lyme IgG and IgM Western blots, negative CCP, negative ANCA panel, negative anti-dsDNA, negative anti-thyroid antibodies, normal comprehensive quantitative immunoglobulin profiling (G/A/M/E/D, and G and A subclasses)	ANA 1:40 speckled without clinical evidence of lupus, an anti-IgE-receptor antibody level found in 6/22 to be slightly elevated at 13.7 (normal < 10, not yet repeated) without history of urticaria
81	F	32	W	0	33	Early in infancy it became apparent that she was unusually reactive to sensory stimuli, though she seemed to outgrow this by about 1 year of age. Early in toddlerhood, she started developing "skin sensitivities," with cracking and bleeding of the skin in many places. She was also found early to have "athlete's foot" on her feet, but causes for all of these skin problems were not immediately appar…	random urinary histamine at 500 nmol/mg Cr (normal 0-450), plasma heparin at 0.04 anti-Factor Xa units/ml (upper normal 0.02), random urinary N-methylhistamine at 241 mcg/g Cr (normal 30-200), 24-hour urinary histamine at 13,234 mcg/24h (normal 0-65), increased (i.e., > 20/hpf) mast cells seen on CD117 staining in 6/21 of EGD biopsies originally obtained and found unremarkable on EGD in 5/20 (but…	negative anti-IgE and anti-IgE-receptor antibody levels, RF negative, CCP negative, negative anti-cardiolipin and beta-2-glycoprotein-1 and anti-phosphatidylserine/anti-prothrombin antibody profiles, negative alpha-gal, normal IgG/IgA/IgM/IgE and IgG subclasses	ANA 1:320 (speckled) without clinical evidence of lupus, normal to mildly positive anti-thyroglobulin and anti-thyroid peroxidase antibodies but with persistently normal thyroid function tests and without clinical evidence of thyroid disease
82	F	37	W	0	37	She had tachycardia to 200 bpm right at birth and had to stay in the NICU for a few days longer than usual before it spontaneously settled down and she was able to go home. The rest of infancy and toddlerhood seemed unremarkable except for some increased reactivity to odors compared to her peers. Around age 5, she suffered a bout of epiglottitis shortly after eating popcorn at her grandmother's h…	plasma prostaglandin D2 in 8/22 at 266 pg/ml (normal 35-115), 24-hour urinary histamine in 8/22 at 0.155 mg/24h (normal 0.006-0.131)	negative anti-IgE-receptor antibody level, negative anti-thyroglobulin antibody, normal comprehensive quantitative immunoglobulin profiling (G/A/M/E/D), normal IgA subclasses, normal IgG2/IgG3/IgG4	slight IgG1 subclass deficiency
83	F	29	W	10	diagnostic work-up in progress	Around age 10 she started complaining of "an irregular heartbeat." It sounds like she underwent some sort of Holter monitoring which was read as normal; this problem has continued at occasional irregular intervals ever since, and she thinks it often is triggered by "stress." At 11 (which was also around the time her home began suffering a number of bouts of water damage and became chronically mol…	random urinary N-methylhistamine in 6/22 at 204 mcg/g Cr (normal 30-200)	negative anti-IgE and anti-IgE-receptor antibodies, normal comprehensive quantitative immunoglobulin profile (G/A/M/E/D, and G and A subclasses), negative anti-thyroid antibodies, negative HSV serologies, normal vitamin D, negative ENA panel, normal RF, negative celiac serologies, negative CCP, negative beta-2-glycoprotein-1 antibody profile	high EBV VCA/NA/EA IgG high but negative VCA IgM and no clinical evidence of past or present EBV infection, ANA 1:80-1:320 (nuclear, dense and fine speckled; or homogeneous and speckled) without clinical evidence of lupus, mildly high IgG to gluten without clinical evidence of gluten sensitivity
84	F	24	mixed	0	diagnostic work-up in progress	She started having frequent upper ear infections almost immediately, and by age 2 she also started having frequent respiratory tract infections, including at least one bout of pneumonia, and she soon came to be diagnosed with reactive airways disease. "She was always on some kind of nebulizer (albuterol, Ventolin, and others) and different kinds of steroids." Also in toddlerhood she started suffe…	increased (i.e., > 20/hpf) mast cells found on CD117 staining in 8/22 in 6/21 duodenal and gastric biopsies (originally read as essentially normal, but CD117 staining showed 40 mast cells/hpf in the duodenum and 30 mast cells/hpf in the gastric antrum)	normal total IgG, IgA, IgE, IgD, IgA subclasses, and IgG1/IgG3/IgG4, negative celiac serologies, negative environmental and food RAST panels	slightly elevated IgM and IgG2
85	F	14	W	0	15	Born with large ventricular septal defect (VSD), heart failure at 10 days, treated medically and VSD closed by 4 months. Developed asthma as an infant and severe food allergies, including nuts. As a child also had severe seasonal allergies. At age 3 diagnosed with celiac disease. At age 14 was found to have elevated anti-thyroid peroxidase (TPO) antibodies, and she complained of fatigue, frequent…	Multiple elevated plasma histamine levels (19.3 ng/ml, 11.4, 13.3, 10.8, 8.9, 7.5, 6.5, 6.2, 6.0, 4.4, all on the same assay, normal < 1.8)	Normal IgE, IgG, IgA, IgM, RAST food and environmental panels negative	ANA > 1:2560 (homogeneous pattern) and anti-double strained DNA antibodies 35.3 IU/ml (normal <27) but no clinical evidence of lupus, anti-SSB 1.1 AI (normal <1) but repeat anti-SSB negative, Lyme Western blot IgG positive on band 41 (but no clinical evidence of borreliosis), EBV capsid IgG positive and then negative on repeat, EBV capsid IgM positive and then repeat negative (and never any clini…
86	F	38	W	3	48	Seasonal allergies in early childhood but then developed reactivity to certain odors and chemicals. Also had patches of eczema. In her late teens, she started having paradoxical reactions to medications. Severe motor vehicle accident at age 25 causing head trauma, coma, and language cortex damage. After this, she developed multisystem symptoms that no one could explain. Developed irritable bowel …	Multiple elevated plasma histamine levels (2.8 ng/ml, 3.4, 2.5, all on the same assay, normal < 1.8), multiple elevated chromogranin A levels (115 ng/ml and 124 ng/ml, both on the same assay, normal 21-106)	Negative ANA, negative anti-thyroid antibodies, normal total IgA and IgM and IgG, EBV VCA IgG positive and EBV EBNA IgG positive, negative EBV EA IgG and EBV VCA IgM	E. chaffennis IGG low-positive 1:64 but switches from low-positive to negative and back over time. Anaplasma phagocytophila IgG positive 1:64 (normal <1:64) but alternates from low-positive to negative and back over time. C. burnetii IgG titer 1:16 (normal <1:16), Lyme IgG Western blot posiitve on bands 41, 58, and 66 at one time but only band 41 on repeat, Lyme IgM Western blot alternating from …
87	F	46	Asian (South)	around 18	51	She was relatively well until her late teens/early adulthood, when she started experiencing increased anxiety and depression but was otherwise well until her second pregnancy, during which she gained more weight than expected. Since then, she has had large swings in her weight, up and down, with no clear drivers for upswings or downswings. At her initial visit, she was having difficulty losing we…	Plasma histamine 15 ng/ml (normal 0-8), serum chromogranin A 170 ng/ml (normal 21-106), multiple GI tract biopsies showing increased (> 20 per high-power (400x) field (hpf)) mast cell counts on CD117 staining (terminal ileum 30/hpf, cecum 25/hpf, transverse colon 30/hpf, sigmoid 25/hpf)	Positive EBV VCA IgG and NA IgG (negative EA IgG and negative VCA IgM), normal total IgG/IgA/IgM, normal anti-IgE antibodies, Candida albicans IgG positive but negative IgM and IgA.	ANA positive once 1:80 (no clinical evidence of lupus), anti-thyroid peroxidase (TPO) antibodies slightly positive once and subsequently repeatedly negative, Lyme IgG and IgM Western blots repeatedly positive only on IgG band 41 and IgM band 23 (no clinical evidence of borreliosis), C. pneumoniae IgG varying from 1:128 to 1:32 (normal < 1:16)
88	M	52	W	10	52	He reported digestive issues since childhood (around age 10) when he started to notice that certain foods caused pain, reflux or diarrhea. He was given some sort of vitamins as a child but could not tolerate them due to severe headache and brain fog. As an adult, he has experienced the same reaction to any oral vitamin/supplement he has ever tried but tolerates intravenous and intramuscular formu…	Random urine histamine at 688 nmol/g Cr (normal 0-450), random urinary leukotriene E4 at 290 pg/ml (normal <= 104), plasma histamine at 2.2 ng/ml (normal <1.8), serum chromogranin A at 185 ng/ml (normal 21-106)	normal anti-IgE antibodies, EBV VCA IgG and NA positive but EA IgG and VCA IgM negative	Mild IgM deficiency (32 mg/dl, normal 40-230), elevated ASO (440 IU/ml, normal < 200) without clinical evidence of Streptococcus infection, elevated DNAse-B antibody 378 U/ml (normal <301), Mycoplasma pneumoniae IgG 2.44-4.44 (normal < 0.91) but no clinical evidence of past or present M. pneumoniae infection, ANA 1:80-1:160 (normal < 1:80) with no clinical evidence of lupus
89	F	17	W	13	17	Early childhood unremarkable except for living in a moldy home and nose bleeds starting around age 5. New onset anxiety at age 13, associated with intermittent abdominal pain and nausea. Symptoms spontaneously resolved after 1-2 years except for seasonal allergies needing loratadine 10 mg once daily during the spring and fall. At 17 suffered Covid-19 infection, followed a month later by onset of …	24-hour urinary leukotriene E4 at 193 pg/mg Cr (normal <= 104), plasma heparin 0.04 IU/ml (normal <= 0.02), plasma histamine at 10 nmol/L (normal 0-8)	Normal total IgA, IgG, and IgM, negative Lyme IgG and IgM Western blots, negative anti-cardiolipin antibody profile, negative anti-gliadin antibodies	Elevated anti-DNAse-B antibodies (128 U/ml, normal 0-120) with no clinical evidence of Streptococcus infection, ANA 1:320 speckled but without clinical evidence of lupus, mildly elevated anti-thyroid peroxidase antibodies at 32 IU/ml (normal 0-26) without clinical evidence of thyroid diseaes, strongly elevated IgE at 3409 IU/ml with no hypereosinophilia, elevated specific IgE to all foods on a fo…
90	F	37	W	35	37	multiple gastrointestinal symptoms; intermittent sinus tachycardia, palpitation, hypertension/hypotension up to syncope; elevation of transaminases, steatotic hepatitis; respiratory, eye, central and peripheral nervous system, and skin/mucosal symptoms; fatigue; susceptibility to bacterial infection	mast cell mediator release syndrome; response to H1-antihistamines		ANA 1:160 (normal < 1:80); EBV IgG antibody positive; parvovirus B19 IgG positive; enterovirus IgG antibody positive; Mycoplasma pneumoniae IgG antibody positive; anti-double stranded DNA antibody repeatedly mildly elevated at 21.9-24 IU/ml (normal < 20 IU/ml) without clinical evidence of lupus
91	F	33	W	at early childhood	33	multiple gastrointestinal symptoms; hypotension; vertigo; hot flashes; bleeding tendency; respiratory, eye, CNS, peripheral nervous system, skin symptoms; fatigue; interstitial cystitis; susceptibility to bacterial infection	mast cell mediator release syndrome; increased disseminated mast cell density in the gastrointestinal tract; elevated urinary N-methylhistamine at 218 mcg/g Cr (normal 30-200), elevated plasma heparin at 0.07 IU/ml (normal < 0.05 IU/ml)		CMV IgG positive at 195 AE/ml (negative < 6.00 AE/ml), EBV IgG positive at 171 E/ml (negative < 20.0 E/ml)
92	F	54	W	49	54	multiple gastrointestinal symptoms; vertigo; hot flashes; bleeding tendency; respiratory, eye, CNS, peripheral nervous system, skin symptoms; fatigue; anaphylactic shock not due to IgE or IgG	mast cell mediator release syndrome; increased disseminated mast cell density in the gastrointestinal tract; elevated plasma heparin at 0.14 IU/ml (normal < 0.05 IU/ml)		Elevated EBV IgG at 439 U/ml (normal < 20 U/ml) with no history suggestive of EBV infection, anti-hepatitis A antibodies positive with no history suggestive of hepatitis A infection
93	F	49	W	42	49	multiple gastrointestinal symptoms; hypotension; vertigo; hot flashes; bleeding tendency; respiratory, eye, CNS, peripheral nervous system, skin symptoms; fatigue; susceptibility to bacterial infection	mast cell mediator release syndrome; increased dissiminated mast cell density in the gastrointestinal tract		anti-adrenal antibodies without clinical evidence of adrenal disease; elevated VZV IgG without clinical evidence of past or present VZV infection; off-the-scale EBV IgG at > 750 U/ml (normal < 20) without clinical evidence of past or present EBV infection
94	M	38	W	26	38	multiple gastrointestinal symptoms; hypotension; vertigo; hot flashes; respiratory, central and peripheral nervous system, and skin symptoms; fatigue; myopathy; prior complete resection of a right axillary mastocytoma	mast cell mediator release syndrome; increased disseminated mast cell density in the gastrointestinal tract; elevated chromogranin A at 104 ng/ml (normal < 102 ng/ml) without confounding factors; elevated plasma heparin at 0.07 IU/ml (normal < 0.05 IU/ml); elevated 24-hour urinary leukotriene E4 at 656 pg/mg Cr (normal < 385)		Mildly elevated Chlamydia pneumoniae IgG at 26 U/ml (normal < 16 U/ml) with no clinical evidence of past or present C. pneumoniae infection
95	F	15	W	<14	15	multiple gastrointestinal tract symptoms; intermittent sinus tachycardia, palpitation, vertigo, hot flashes; bleeding tendency; respiratory, eye, central and peripheral nervous system, and skin/mucosal symptoms; multiple bone fractures after minimal trauma; fatigue; interstitial cystitis	mast cell mediator release syndrome; increased disseminated mast cell density in the gastrointestinal tract; plasma heparin level elevated at 0.16 IU/ml (normal < 0.05 IU/ml); elevated plasma prostaglandin D2		positive lupus anticoagulant antibodies, and mildly elevated anti-cardiolipin IgG at 35.4 U/ml (normal < 20 U/ml), and elevated beta-2-glycoprotein-1 antibodies at 42.7 U/ml (normal < 20 U/ml) without clinical evidence of past or present thromboembolism or anti-phospholipid antibody syndrome; elevated tick-borne encephalitis virus (TBEV) IgG at 371 U/ml (normal < 100 U/ml) without clinical eviden…
96	F	31	W	31	32	multiple gastrointestinal symptoms; vertigo, hot flashes; bleeding tendency; respiratory, eye, central and peripheral nervous system, and skin/mucosal symptoms	mast cell mediator release syndrome; increased disseminated mast cell density in the gastrointestinal tract; elevated plasma heparin at 0.15 IU/ml (normal < 0.05 IU/ml)		elevated anti-thyroglobulin antibodies at 520 U/ml (normal < 100/ml) with normal thyroid function tests and no clinical evidence of thyroid disease
97	M	83	W	77	83	multiple gastrointestinal symptoms; hot flashes; bleeding tendency; respiratory, eye, vertigo, central and peripheral nervous system, and skin/mucosal symptoms; susceptibility to bacterial infection	mast cell mediator release syndrome; increased disseminated mast cell density in the gastrointestinal tract; elevated plasma heparin at .06 IU/ml (normal < 0.05 IU/ml), elevated 24-hour urinary N-methylhistamine at 3588 mcg/g Cr (normal 34-177), elevated chromogranin A at 151.3 ng/ml (normal 19.4-98.1 ng/ml) without confounding factors present, response to mast cell-specific drugs		monoclonal gammopathy of undetermined significance
98	F	55	W	teenage years	55	multiple gastrointestinal symptoms; hot flashes; elevation of transaminases; hepatomegaly; bleeding tendency; respiratory, eye, vertigo, central and peripheral nervous system, and skin/mucosal symptoms; end plate deformity at L1; susceptibility to bacterial infection	mast cell mediator release syndrome; increased disseminated mast cell density in the gastrointestinal tract; elevated plasma heparin at 1.07 IU/ml (normal < 0.05 IU/ml), elevated plasma histamine at 252 ng/ml (normal 25-131 ng/ml), elevated 24-hour urinary leukotriene E4 at 897 pg/mg Cr (normal < 385)
99	M	27	W	childhood	27	multiple gastrointestinal symptoms; bleeding tendency; respiratory, eye, central nervous system, and skin/mucosal symptoms	mast cell mediator release syndrome; increased disseminated mast cell density in the gastrointestinal tract; strongly elevated plasma histamine		elevated EBV IgG at 355 U/ml (normal < 20 U/ml) without clinical evidence of past or present EBV infection; elevated CMV IgG at 6.2 U/ml (normal < 0.7 U/ml) without clinical evidence of past or present CMV infection
100	F	29	W	teenage years	29	multiple gastrointestinal symptoms; intermittent sinus tachycardia, angina pectoris, hot flashes; bleeding tendency; respiratory, central and peripheral nervous system, and skin/mucosal symptoms	mast cell mediator release syndrome; increased disseminated mast cell density in the gastrointestinal tract; elevated plasma heparin at 0.21 IU/ml (normal < 0.05 IU/ml)		elevated EBV IgG at 1:80 (normal < 1:10) without clinical evidence of past or present EBV infection, elevated CMV IgG at 117.3 U/ml (normal < 45) without clinical evidence of past or present CMV infection, elevated influenza A IgG at 49 U/ml (normal < 10 U/ml) without clinical evidence of past or present influenza A infection, elevated influenza B IgG at 17 U/ml (normal < 10 U/ml) without clinica…
101	M	40	W	39	40	multiple gastrointestinal symptoms; intermittent sinus tachycardia, hypotensive crisis, hot flashes; elevation of transaminases, steatosis hepatis; splenomegaly; intermittently lymphadenopathy; bleeding tendency; respiratory, eye, central and peripheral nervous system, and skin/mucosal symptoms	mast cell mediator release syndrome; increased disseminated mast cell density in the gastrointestinal tract; elevated plasma heparin at 0.13 IU/ml (normal < 0.05 IU/ml); response to mast cell-specific drugs		elevated ANA at 1:320 (normal < 1:80) without clinical evidence of lupus; elevated EBV VCA IgG at 490 U/ml (normal < 20 U/ml) without clinical evidence of past or present EBV infection; elevated CMV IgM at 10.7 AU/ml (normal < 1 AU/ml) without clinical evidence of present CMV infection
102	F	32	W	24	32	multiple gastrointestinal symptoms; intermittent sinus tachycardia, hypotensive crisis, hot flashes, angina pectoris; elevation of transaminases, steatosis hepatis; bleeding tendency; respiratory, eye, central and peripheral nervous system, and skin/mucosal symptoms	mast cell mediator release syndrome; increased disseminated mast cell density in the gastrointestinal tract		elevated ANA at 1:160 (normal < 1:80) without clinical evidence of lupus
103	F	30	W	14	30	multiple gastrointestinal symptoms; intermittent sinus tachycardia, palpitations, hypotensive crisis, hot flashes, angina pectoris; elevation of transaminases; bleeding tendency; respiratory, eye, central and peripheral nervous system, and skin/mucosal symptoms; vertigo; interstitial cystitis	mast cell mediator release syndrome; increased disseminated mast cell density in the gastrointestinal tract; elevated plasma heparin at 0.23 IU/ml (normal < 0.05 IU/ml); elevated plasma histamine at 129 ng/ml (normal 30-60 ng/ml)		elevated EBV IgG at 340 U/ml (normal < 25 U/ml) with no clinical evidence of past or present EBV infection; elevated HSV-1/2 IgG at 46000 U/ml (normal < 230 U/ml) without clinical evidence of past or present HSV-1/2 infection; elevated Candida albicans IgG at 96 U/ml (normal < 40 U/ml) despite no clinical evidence of past or present C. albicans infection; elevated ANA without clinical evidence of…
104	F	59	W	~50	59	multiple gastrointestinal symptoms; palpitations, hypotensive crisis, vertigo, hot flashes; elevation of transaminases; bleeding tendency; respiratory, eye, central and peripheral nervous system, and skin/mucosal symptoms	mast cell mediator release syndrome; increased disseminated mast cell density in the gastrointestinal tract; elevated plasma heparin at 0.09 IU/ml (normal < 0.05 IU/ml)		mildly elevated p-ANCA at 6.2 IU/ml (normal < 3.5 IU/ml) without clinical evidence of Wegener's granulomatosis; elevated rheumatoid factor at 26.2 IU/ml (normal < 15 IU/ml) without clinical evidence of rheumatoid arthritis
